# Supplementary material
Source: Research Square preprint supplement (doi:10.21203/rs.3.rs-8738924/v1)
Supplement: Supplementary file 1 [file 5f66760706a120c8e6c7d4eb.docx]

**CHAPTER 6**

**ZELDA**

The following are excerpts from the discussion between Zelda and Sibongile:

**Lack of resources**

Sibongile: According to your experience, Zelda, what may be the contributing reasons that make young women seek to be in a relationship with a blesser?

Zelda: Women seek to be in a relationship with a blesser because of a lack of resources, and a lack of love in the past. Where we come from, we weren’t built enough, we haven’t been loved enough, meaning that something was lacking in five elements, which comprise the emotional, physical, relational, spiritual and … there is just one more …

Sibongile: That is an insightful and reflective account of reasons propelling women to be in a relationship with a blesser.

Zelda: So those aspects aziphelelanga [are incomplete]. Oh, and financial! Lacking is the devil. Lacking financially is really the worst. The Bible says that the root of evil is money, but lacking is far worse. Poverty is not a good thing, because it leads to people doing all sorts of things that may put their lives at risk, such as prostitution.

Sibongile: I agree that in times of desperation one may resort to extremes to make ends meet. Overall, you feel that it is crucial to investigate these five elements and how they impact one’s overall well-being.

Zelda: So, if those elements that are supposed to build you – and any human being for that matter – are lacking so much that by the time you have found someone, you find that you only have two. For example, it may be that one of them is your emotional needs, but you also find that your emotional needs are inadequately met.

Sibongile: What is the implication of the different needs not being met?

Zelda: If over time the needs are not met, it results in so much lack that it puts one in a vulnerable situation.

Sibongile: I can envision how challenging it may be to experience so much lack.

Zelda: Yes! Especially if everything is lacking, you can picture getting into a relationship with a person that is continuously breaking you.

Sibongile: Instead of building you up.

Zelda: You can already tell that one’s self-esteem is going to be depleted in that process of constantly being broken down. I guess when you are in that space, it is easy to assume that no one will truly appreciate and love you for who you are. It seems easier to rather settle for the devil that you know.

Sibongile: Does it mean that one would be feeling that there are no alternatives for them to change their lives around?

Zelda: It becomes that kind of situation. It stems from where we come from as people. If you really listen to my story, if you’re a spiritual person, you can see that there are a lot of generational curses from my mother’s family. Unintentionally her mother’s lack of guidance and support caused a lot of pain and suffering in my mother’s life.

(First interview, 19 March 2022)

**Void caused by paternal figures**

Zelda: I’ve always longed to be loved and to love.

Sibongile: Yes, tell me more.

Zelda: Always, always. So, with that being said, I always had hope for a good relationship. A positive and healthy relationship. My stepfather, whom I believed to be my father, never really showed us the affection that we needed. Nonetheless, that never really affected me that much. It’s just when I got older and understood. You know, when you get to the age when you start wanting to be in relationships that build, then you start to see what I’ve mentioned. You start dating people, and relationships that work are relationships with men who have certain traits that resemble your dad. You know, when they say girls marry their fathers?

Sibongile: Yes, I agree to an extent that a relationship that a girl has with their father sets a particular standard of how they expect to be treated and cared for in a relationship.

Zelda: Looking back, I can say that God’s grace has always been with me. I am just disappointed in my first loves, which are my stepdad and my biological dad. They really haven’t played that role. They haven’t! The hope now is in the person that I meet that he will pick up the pieces of my unmet needs.

Sibongile: Do you feel that you have healed from past experiences? I understand that it was not easy having to go through the disappointments of your stepdad and biological dad.

Zelda: Not really, because my stepdad was mean and difficult till the end. I don’t think I have healed, to be honest, because even just talking about it right now makes me feel like crying.

Sibongile: I acknowledge that the healing process is still fresh, hence the intensity of the emotions.

Zelda: Definitely, kusase buhlungu [it still hurts].

Sibongile: I completely understand. It takes time to heal from such experiences and therefore requires one to be patient with themselves, but also to seek the necessary support if you feel that it is a necessity to do so.

Zelda: I’m not even sure if what I have been through is something that I can completely heal from. How do I even start healing from that?

Sibongile: It is good, though, to hear that you are no longer living in a toxic home environment. Therefore, try to remind yourself of the current environment that you are finding yourself in right now. Also, think about the predominantly positive people and experiences that you have in your life.

Zelda: Ok, I hear you. I will try and process my pain by reminding myself of how I am no longer experiencing everything that once hurt me.

Sibongile: Yes, by doing so you are allowing yourself to shift focus from experiences that you cannot change by making room for new positive experiences.

Zelda: I understand what you are saying, because reality is I cannot change what I have experienced. I really do need to find means and ways of continuing with my life. Just thinking about my recent past, I am realising that I am not angry, I am just hurt.

Sibongile: Your stepfather’s behaviour really hurt you.

Zelda: Still does.

Sibongile: It does sound like you may benefit from one-on-one therapy sessions with another psychologist, whom I will gladly refer you to if it is something that you may possibly consider.

Zelda: Sure, I would appreciate that very much.

Sibongile: You are welcome. I have a printed copy of details of three clinical psychologists located in local clinics in Soweto.

Zelda: That is great.

Sibongile: Please see which location may be best suited for you. Whenever you are ready, please do go to the clinic to consult.

Zelda: Will do. I have not attended therapy before, but I do think that it will help me overcome these emotions that feel so overwhelming at times.

Sibongile: Do you feel that you would be able to continue with the interview now, or do you think that you need a break or that we should stop for today?

Zelda: I am still able to continue. It is just that my stepdad brings a lot of painful emotions, but I am feeling at ease now that I will have the space to talk about it all in therapy. Looking back, I know that my mom didn’t deserve that kind of treatment because of the type of woman she was to him and to us. Nonetheless, what made me happy as a child is that I really lived up to please her. And that’s why even though she’s gone, I am at peace. I’m OK, I know she’s resting. She’s away from that man.

Sibongile: Even though we are not able to undo the past or even change your stepfather, you can choose to rather focus on the positive experiences and memories that you had with your mother. She must have felt proud and impressed by your efforts to make her happy.

Zelda: I hope that she did, because I really tried my best. I gave her everything that she longed for. I fixed her house; I gave her tangible things. I said, “This is for you. I am doing this for you. I bought this for you. This is money for you.” So, things that she longed for as a woman that she didn’t get from her man, I made sure that when I had, I did that for her. So, the only hurt that I carry is the memories of what he did and what he said.

Sibongile: It feels good to hear about your attempts in taking care of your mom. You really did your best by showing your mom that she is worthy of being loved.

Zelda: Thank you. I appreciate your kind words. I do need to start letting go of the words that my stepfather used to call my mom. Imagine, he would call my mom stupid over salt. That is just ridiculous. Shame to him! I will try to embrace more of the positive experiences, since the negative ones make me feel hurt. I really do not like feeling hurt.

(First interview, 19 March 2022)

**Intense need to be loved results in overlooking the marital status of the blesser**

Sibongile: Looking back and reflecting on your experiences, would you ever again date a man who’s married?

Zelda: The thing is, I still want to have a home of my own. I look at the types of relationships that I get now, and I mean, if I get something like what I had with that guy …

Sibongile: Yes?

Zelda: I probably would, because you know the single guys these days, based on personal experiences, there’s so much toxicity in the air. There is so much lacking.

Sibongile: Does that mean that you would rather be in a relationship with a man that is already in a committed and stable relationship?

Zelda: Yes, I feel that it’s even better to find a well-oiled man, someone that’s been worked on.

Sibongile: Meaning that it won’t be your responsibility to work on and improve the man, because he would be coming into your life already having someone who is doing that for him.

Zelda: You know – and this is just me being honest – if he comes with the right intentions, and does everything right, I mean why not?

Sibongile: Even if he doesn’t talk about marrying you? Even if he tells you that he is settled and is good where he is but still loves you?

Zelda: I think more than anything, the biggest thing for me is knowing what I need at that time. Each relationship serves a purpose. Maybe at that time I just need someone that is going to listen to me. And if he is the only one around that can, it will be OK. If he says he can’t marry me but he’s there when I need him to be there, then I am fine with that.

Sibongile: I am hearing that you appreciate companionship regardless of the marital status of a man.

Zelda: Yes. I want and appreciate being taken out, because sometimes all you need is also just a date. To be pampered. If he’s bringing the things that I need at that moment, I don’t see why not, because right now you save yourself up for a relationship with someone that doesn’t want to do those things for you and doesn’t see ukuthi [that] you deserve those things.

Sibongile: I wonder if it would be a matter of not having the capacity to do so, or just unwillingness to meet your needs and desires.

Zelda: Argh, it is so annoying, because guys these days sometimes don’t want to date you with their finances.

Sibongile: It sounds confusing to think of why a man would want to be in a relationship with you, yet not want to take good care of you.

Zelda: I don’t know. If I get someone who is willing to spend their money on me and who tells me that I deserve to be spoilt, then I would go for it without any hesitations.

Sibongile: What emotion are you feeling as you are speaking right now?

Zelda: Calmness, as I foresee the bliss awaiting me if I were to be blessed soon with a guy that does not mind spending money on me.

Sibongile: You are really looking forward to meeting a person that will meet your standards and needs.

Zelda: Oh yes, absolutely. I will just do it, because I have realised that it’s nice to date yourself, but it’s even better to be taken out on a date.

Sibongile: I suppose it depends on one’s needs at a particular time in their life.

Zelda: But being taken out on a date is way better. It’s the company, the type of place that you go to, the car that you’re driven with. It’s everything these days that matters, you know.

Sibongile: Relationships are getting so complex, but what I am hearing is that the priority is for your needs to be met.

Zelda: Yes, for example, thinking about my ex. Even though I can’t be with him, because he is married, I really appreciate and miss everything that he did for me. I really do. He catered for my needs fully.

(First interview, 19 March 2022)

**Complex dynamics of dating a (married) blesser**

Zelda: So, when my ex told me that he was married, I felt that I could just block out that information altogether. I wavered a bit, but it was already too late. I was like I am already in. So, there was just no turning back from where I was.

Sibongile: You were happy to be with him, hey?

Zelda: It was very satisfying to be with him. He really exceeded my expectations so much. However, what hurt me was finding out that, at the time, his wife was pregnant with their third child.

Sibongile: Oh really?

Zelda: That broke me, because I felt that if they are bringing another life, clearly it means that they are happy. It just puzzled me, as I was thinking about it and asking myself why would he involve me in his life if he is a happily married man? I mean the relationship was really working for me.

Sibongile: I can picture the disbelief and disappointment. I suppose you began asking yourself what your purpose was then in the relationship.

Zelda: Exactly! This guy came into my life when the money that I was making was not that good, so he was assisting me a lot.

Sibongile: All right, my dear, I’m interested in finding out, based on the predominantly positive experiences that you had with your former boyfriend, what caused the relationship to end.

Zelda: Remember I mentioned that his wife was pregnant? It was time for her to give birth. Ay, men though. He booked us into a hotel, and we were there for like three nights or something, so he was free to spend time with me. During that time, he was telling me that he was considering making me his second wife. He told me that he would give me time to think about it. We slept peacefully the first night. The morning of that night he gets a call from her screaming on the phone, “Come fetch me now, I can’t be here!” She was at her mom’s place just so that she could get help with the baby.

Sibongile: How did that make you feel?

Zelda: Dismal. So infuriated! She doesn’t get along with her sister, so she doesn’t want her sister to be around the child, and she went on telling him to come and fetch her. I could tell that he felt that he was being pushed into a corner, as he promised her that he would fetch her there and then.

Sibongile: Your plans of spending more time together were being cut short.

Zelda: He started from the bed and then he moved to the balcony, I guess to have more of a private conversation with his wife. Immediately when he came back, I had tears in my eyes.

It was just sad, because he knew I’d be missing him.

Sibongile: From your conversations, hey?

Zelda: Yes, and you know what he says to me?

Sibongile: No?

Zelda: He says, “Ah, why are you acting like this? You knew what you signed up for.” Sibongile: Oh, that hurts!

Zelda: We never recovered. We just never recovered from how things played out that day and beyond.

Sibongile: Oh Zelda!

Zelda: For me, it was a reality check: Wow, this is your life girl. This is your life.

Sibongile: And it’s a life that you chose because it made you happy, right?

Zelda: I guess I can’t even complain at this point, because I should have known that.

Sibongile: He’s already married, he is a married man.

Zelda: Exactly! He just rubbed it in my face by reminding me that the situation won’t change. That if I continue being with him, that will be my forever. So, after doing my reality check, I decided that I was not going to continue being with him any longer. It was just over.

Sibongile: Did you continue communicating or seeing each other?

Zelda: No. We stopped communicating for a good two years. We fizzled out, because as soon as the baby was born, we couldn’t even find time to talk. I think he was excited about the new-born baby.

Sibongile: That is true.

Zelda: So obviously it was easy for me to slip through the cracks.

(First interview, 19 March 2022)

**Gender script of a blesser**

Zelda: I remember there was a time when there was a special at Checkers Hyper and everything was going for like R50 in bulk.

Sibongile: Wow, the prices were very cheap!

Zelda: And I didn’t have cash at the time, and I told him that there was a special at Shoprite. I was scared to even ask him, because this was someone I loved. As much as I knew he had money, I didn’t want him to feel that I wanted his money.

Sibongile: You were intentional in showing that you valued more his presence and love, rather than his money.

Zelda: Exactly, and because he was a Zulu guy, after I spoke to him, he was like, Ngicela ungangijwaeli kabi. NgumZulu mina. Ngi gcwala ibroko lami. Ngiyindoda. [Please do not patronise me. I am a Zulu man. I make more than enough for myself and even more. I am a proud Zulu man.] He told me that I must not ever think that he can’t do anything for me!

Sibongile: He was really confident and proud in his ability to take care of you fully.

Zelda: I can’t fault him for feeling proud, because wow the security that he provided! Remember that I grew up in a home where my mom was the breadwinner. My dad never worked a day in his life from what I remember. Since my primary school years.

Sibongile: So, your mom was self-sufficient to sustain the needs of the household.

Zelda: She tried, but we were living way below our means of survival. Dirt poor I tell you. Having a guy who could provide for my means so effortlessly with no questions asked was a mind shift. That really changed my whole perspective on relationships, to be honest.

Sibongile: That was an entirely different experience for you.

Zelda: It set the pace for what I deserve as a woman and what I can get. To this day I’m always looking at guys that can live up to his standard.

Sibongile: Seems he has raised the bar to be quite high.

Zelda: He set it high in so many ways, and it is not just the financial part of it. But it depends on your mental stability and where you’re at when this is happening to fully grasp it for what it is. Thank God I was able to see it for what it is, so that I can look back at it as a positive in my life.

Sibongile: OK, yes.

Zelda: I mean, he would speak about things like polygamy as mentioned. At the time, I was so young, I think I was around 23 or 24. I was unsure about the whole thing, how my family would take it, and maybe that’s why we fumbled – because of my fear. Looking at it now, if it were to come back now, I’d probably go for it just because of the level of respect, the comfort, the love, the security which every woman wants.

Sibongile: And deserves …

Zelda: And deserves! As much as the young girls are doing it for the soft life, there are certain needs that they want out of that. It could be daddy issues that is confronting some of them. Like I said, my dad was never supportive. For me to see a man do that filled a need. The biggest thing is the why.

Sibongile: You are saying that the benefit of living a soft life when in a relationship with a blesser may be understood as a surface-level need in comparison to underlying needs such as receiving attention and love from a male figure.

Zelda: Exactly. And some of them get toxic, because if you find a blesser who is just a paedophile and who is going to want you to do certain things because it pleases them whilst not being considerate of your feelings, that is a red flag.

Sibongile: The biggest goal is to have your needs met in a relationship. The fact that the person you are in a relationship with is married with children does not really matter that much?

Zelda: If the guy is already married, he obviously needs to make time to spend with me. I am comfortable being in the scenario that you have described above. My ex changed how I look at men. That relationship was godsend. If I had not had that relationship, I would have probably just been in a string of bad choices. My mom even knew about the relationship. She was so happy to see how the money that he was giving me was helping us out at home.

This other time I used the money that he gave me to paint the house.

(First interview, 19 March 2022)

**Role of social media (and peer pressure) in promoting the blesser-blessee phenomenon**

Sibongile: I would like to enquire about your thoughts on social media and the topic that we were discussing.

Zelda: I think that social media has an impact on the topic at hand, because we live in a time where people are constantly comparing themselves to each other. We hear slogans such as “Be yourself”, “Don’t compare yourself to others”, but we do. As a person you have desires. When you see something that looks like what you want, automatically you are going to compare your life according to that.

Sibongile: Yes?

Zelda: It is all about how content you are. Most young women between the ages of 22 to 35 are not content. Some even beyond 35. It is women that are still trying to find their place in the world, so they’re easily influenced. Unless you really have your eyes on the ball in terms of being specific about what it is that you want for your life. Then chances of being easily swayed from what you set out for yourself are slim.

Sibongile: You are saying that there needs to be a certain level of awareness in how young women and everyone, in general, interact with social media, so much so that one does not fall prey to being vulnerable and being exploited in any social media platform.

Zelda: It depends. Ezinye izinto [some things] come from your background that play a big part in these things. Sad as it may sound, some kids are brought up by social media. They get their advice on social media. Whatever it is that they don’t know or don’t understand, social media is their go-to point. This is the case because of how readily available information is on social media, making it ok for them to take the information as is and run with it. Without a doubt, social media play a big part.

Sibongile: Thought-provoking insights that you have shared. I would like to find out about your relationship with social media, especially linking it to the topic at hand.

Zelda: I remember at first, maybe a year or two ago, it really made me feel intimidated. You look at social media and then you look at your life, and you ask yourself: What is wrong with me? Why am I not like others? That is how I felt about myself when I allowed myself to get into social media, but now I have even had moments when I delete social media off my phone. I take a break from it. Even when I have it on my phone, I try to avoid it. Now when I do go in, I go for information. I go in for what I want specifically. Even if you see the feeds of other people and whatever lavish life they are living, even though slightly desired, it doesn’t affect me now. Ngiyababongela [I am happy for them]. I try not to compare my life or question my position based on what other people are posting. I appreciate everything that I see on social media. I do think that all that people are sharing is beautiful, but I don’t let it into my life like that.

(Second interview, 5 April 2022)

Sibongile: It is admirable how you have created a safe boundary for yourself in relation to social media.

Zelda: I have learned to do so over the years. Have you seen how social media will depict pictures of a 24-year-old living a life of a typical 35-year-old? Inevitably that puts insurmountable pressure on the 24-year-old, who may be at varsity at the time, to live up to the standards of a much older person. I feel that if a young woman were to use a rich man to live a certain lifestyle and to feed and satisfy their needs, then clearly their mental health is not okay. Moreover, I also believe that their spiritual life is not intact, otherwise they would feel bad and guilty for using someone for their money. Not to feel remorseful to just be taking is not ok.

(Third interview, 10 December 2022)

**Role of clinical psychologists in addressing the blesser-blessee phenomenon**

Sibongile: Do you feel that professionals such as psychologists have a role to play regarding interventions that may possibly address the blesser-blessee phenomenon?

Zelda: I think psychologists can assist. I think that the problem is the availability of psychologists. I wonder whether young women would know where to reach them should a need arise to do so. Moreover, are psychologists availing themselves for these young girls? I wonder if they are visiting primary and high schools. Like I said, social media has become deeply entrenched within us. There was this thing that young people were doing at schools called the konka school challenge. It was trending all over social media platforms.

Sibongile: What are your views regarding the konka school challenge?

Zelda: School children are seen in their uniforms but also wearing branded clothing items. They are imitating a lifestyle of persons that are typically above the age of 30. Such behaviour is happening in high schools. If any of those girls were to be approached by an older man that can start giving them money, they are going to take it and go, because they are ready to live that kind of lifestyle. So, I do think that psychologists are the ones that can plant that seed in these young girls, but bakhuphi [where are they]? Are they available, especially when considering young people that are not from the affluent neighbourhoods? For example, when you look at places like Soweto, children in those schools lapha eKasi [at the townships] are not really exposed to money. When money is a scarcity at home, it means that by the time another person seduces you with money, you forget everything. You forget your values, principles and morals. What then happens is that they focus on the now, meaning that they don’t think about the consequences of being in a relationship with a blesser. They tend to live in the present, which can be to their detriment. It is only at our age when you know that the decision that you are making right now is really going to affect you tomorrow or in a few months to come, but because they are young and they are living in the moment, they do not really think in that manner. So, if psychologists visit schools and make themselves available in the community, then definitely there is bound to be positive changes. It is not about forcing people, but it is about planting a seed that says yes, there is this desire, there is this life, there is this thing that is going on in the world, but focus. Focus on doing well at school. Focus on building the life that you would like for yourself without having to get it through an elderly person coming to you to seduce you. The psychologist can try to make young people understand that, as girls, there may be instances when an elderly man approaches and proposes to them. However, it is important to highlight that they need not give in to such pressures, as they can still get all that they desire through school.

Sibongile: That was an in-depth account of how psychologists may be actively involved in the lives of young people. From what you have shared, it seems that psychologists can possibly be role models to young people.

Zelda: Yes, most certainly.

Sibongile: From what you have shared with me, psychologists need to emphasise to schoolgoing children that they need to be patient with themselves, as they will be able to afford the life that they aspire to.

Zelda: Exactly. Imagine if they see somebody that is wearing those things that are looking like that thing that they want. Imagine stepping in as a psychologist and you are dressed to a tee. It’s not like you are pretending to be something that you are not. You are that and you are saying, I went to school. I studied very hard at school and therefore I can afford the things that I want for myself fully. Basically, the message to the school children will be that if they, too, persist and focus on school, then they can also become successful in their future careers, which would enable them to live the life that they aspire towards. The psychologist can go a step further by thinking of starting up activities that will facilitate the process of getting to know the kind of backgrounds that the school children are coming from. Once that system is up and going, teachers can prepare the children in advance by grouping them according to the prevalent problem that has been identified. For example, one group may consist of children that are not exposed to money, whilst other groups may look at other challenges that school-going children experience. Therefore, the psychologist would then need to prepare prior to the meeting and speak with the children about the identified areas that they may be lacking in. There is just a lot that is going on in children’s lives. These days boys are targeted by paedophiles as well.

Sibongile: I agree that psychologists may be exemplary in their teaching and counsel. One cannot underestimate and minimise societal pressure which may be intensified by lack of guidance and support.

Zelda: What I am suggesting, I think, can work out if teachers work in unison with psychologists and parents. The teacher’s involvement will assist the psychologist to get a clear understanding of the children’s backgrounds, so that interventions can be tailormade. For example, a child that is used to money would not easily fall for that kind of lifestyle. Also, if a girl child is raised in a home environment that consists of a mother and a father who are both working, then chances of the girl falling for an elderly man’s advances become slim. There is a phrase that states that a father is a girl’s first love.

(Second interview, 5 April 2022)

**Exiting the blesser-blessee lifestyle**

Sibongile: According to your experience, do you think that exiting the blesser-blessee lifestyle is attainable or even something worth considering?

Zelda: It really depends on what the reasons for being a blessee are. For instance, if you consented to be a blessee because of survival purposes, then you will be able to exit. If the young woman is coming from a poor background and then the blesser comes to her rescue, she can still be able to realise her dreams and goals through the blesser’s assistance. The blesser will see to it that the young woman’s needs are taken care of whilst they study or work a basic job. The important thing is for one to position themselves so that there is not so much of a struggle in meeting day-to-day needs.

Sibongile: So as soon as the needs have been met, then there will not be a reason to continue being in a relationship with the blesser?

Zelda: Yes. However, if the young woman is going to get engulfed in the type of lifestyle that the blesser has to offer, then it is going to be very difficult to exit.

Sibongile: I can imagine how the lifestyle can have such tremendous control over the young woman’s life.

Zelda: If you are there to show off and to post pictures on social media just so that people know of your lifestyle, then unfortunately you will need to maintain that which will make exiting almost impossible.

Sibongile: Certainly.

Zelda: Another point that I want to raise is that of being intentional. If a young woman has bounced from five men and she feels that she does not want to be a blessee anymore, it means that her mindset needs to be right to get to a point where she feels that enough is enough. Nothing is new under the sun. All relationships go through a honeymoon phase, and it ends. We know that men with money can bounce back from a failed relationship so easily, making it so easy for them to move on.

Sibongile: So, by being intentional, do you think that it would aid young women to exit the blessee lifestyle?

Zelda: Young women who are involved with blessers need to realise that it is best for them to build themselves with whatever money that they can make. For example, it is very popular now with slay queens who run hair salons. The thinking should be that if this man is going to do something for me, let him build me something. It means that you go in knowing that the guy is going to build you. If you love shoes, let him help you set up a shoe shop. Let him help you build on what you love, so that you can pull out when you want out or when you are not happy. The reality is that very few of the blesser-blessee relationships last or move on to marriage. Girls need to be smart enough to know when to jump ship.

Sibongile: By being intentional about the reasons for being in a blesser-blessee relationship will help women decide what it is that they are hoping to realise from the relationship?

Zelda: Precisely. Moreover, I feel that this lifestyle is like drugs, making it even more difficult to exit. If you are inside, it and you love it and you are enjoying it, the adrenaline, the vibes – it is so easy to get hooked. If you are not ready to exit, the lifestyle is going to keep pulling you back. You need to be ready when you do decide that you are out. One needs to tell themselves, I’m out and I’m not looking back. That way it won’t be a matter of having one foot in and one foot out. One needs to be fully ready.

Sibongile: A state of readiness is crucial to exiting.

Zelda: Definitely. How many times have people been in and out of rehabs? It is so important to be ready, but because dating a blesser affords one an opportunity to live a certain lifestyle, it really is not something that you pull out of overnight. I sometimes miss the fact that right now I could have been out having fun. On a typical weekend like this, I would be somewhere. I would be with my partner having driven off to a really nice place. It is such an addictive thing, and I miss that, but I have chosen rather to protect my sanity and my peace. That is more important to me. Abanye [some] can decide that they are done with that life and walk away from it immediately. But others, because bayayithanda [they love] that lifestyle, they won’t be able to. So, you need to know yourself more. You need to be in tune with where you want to see yourself and what you want out of this life, so that something like that does not have to bother you.

(Third interview, 10 December 2022)

**Perceived advantages of being a blessee**

Zelda: The advantage of such a business is that you know that you are guaranteed to make money now. You control how your income works. You are driving this bus; therefore, you have the power to build very quickly versus someone who gets paid end of the month. If you are smart enough, you do not have to go to every party. Yes, women do need to mingle, but they can just do it with a selected few clients. Show up to the ones you feel matter the most and build in your corner.

Sibongile: I wonder if it is that simple, though?

Zelda: It is probably not. Some clients can beat you up. It is a very dangerous industry of sex workers or blesser-blessee. I am reminded of sales. It is far better to capitalise on your existing clients, meaning that it would be wise for women in this industry to maximise on being with people that make them thrive. Even if it is just one client in a month who drops 20k. I mean 20k is a lot of money. For example, you can be able to rent to buy a property. You can make constructive plans with that money. Let us assume that the guy sees you four times in a month, then gives you 10k each time they see you. 40k is a lot of money. There are doctors who make that much in a month. So, if you are greedy and feel that you want more and more, then you will constantly find yourself in limbo.

(Third interview, 10 December 2022)

**Searching for true love**

Sibongile: You speak so fondly of your former partner. Have you subsequently been involved with someone like your former partner?

Zelda: You mean someone similar in terms of status?

Sibongile: Yes.

Zelda: So, there was a guy that came into my life. A wealthy man. The problem is bengi ngamuthandi [I did not love him], meaning that our affair could not have lasted. He came in at the right time, because I was at a point where I was starting to feel that my finances were spiralling down. I was doing some work at the restaurants, but it was not enough. He was able and willing to help me.

Sibongile: Seems that he did care a lot about you.

Zelda: Yes, but because I knew that it was not something that I wanted, I decided to let go. I really do want to be in love and to love and be loved. I do not like stringing people along. I told him that we can’t continue. It really broke him. He had already introduced me to some of his friends. He used to take pride in taking me wherever I wanted to go. We used to go out to many different places. I was living every girl’s dream. He spoiled me. He would easily spend R1 500 a night at a restaurant. He really went out of his way to please me.

Sibongile: Seems that he was making a great deal of effort to make you feel happy.

Zelda: He was, and that is where the difference lies with seeing a person as a blesser instead of seeing a person as your lover. I could have simply stayed, but that is not what I want. I want true love. I want to be happy. Whether a person has lots of money or not, I am prepared to build with someone that I truly love.

(Third interview, 10 December 2022)
