# Supplementary material
Source: Research Square preprint supplement (doi:10.21203/rs.3.rs-8738924/v1)
Supplement: Supplementary file 2 [file 8359c6cb2a3a5dd4afc4170d.docx]

**CHAPTER 4**

**PALESA**

The following are excerpts from the discussion between Bophelo and Sibongile:

**History of being sexually abused/violated**

Palesa: I have been abused sexually. It’s just that I don’t want to worry about things of the past. I have been raped more than two times. One time it was by a teacher, but he died.

Sibongile: Sorry to hear about such painful experiences. Did you share with people you trust about what happened to you?

Palesa: I couldn’t even say anything to people, because I have always been that girl who liked boys. Argh, and it would also have been a thing of “Oh, she wanted money from me.” It was just so sudden.

Sibongile: Did you feel that you were going to be judged?

Palesa: Without a doubt. I was too scared of telling people what had happened to me, because maybe they would have said to me that girls that are raped are bad.

Sibongile: That is a myth, though.

Palesa: I guess so, but that is how I felt.

Sibongile: Do you believe that girls that are sexually abused deserved it because of their behaviour?

Palesa: Absolutely not. It is just that at that period in my life, I was behaving like a typical 18 or even 21-year-old, whilst I was merely 10 years. I knew that I was not supposed to be kissing boys, but I could not help it.

Sibongile: The sexual urge was too strong for you to control?

Palesa: Way too powerful. It ruled me. My entire life.

Sibongile: Were you in primary or high school then?

Palesa: I was in primary. He is the one who took my virginity.

Sibongile: You mentioned that you did not report what happened to you?

Palesa: I didn’t want to report it, because no one was going to listen to me.

Sibongile: What about your mom?

Palesa: My mom doesn’t even know. They were friends.

Sibongile: Oh? How come?

Palesa: He taught my mom, and he even taught my dad at some stage. He was very old. Sibongile: I can imagine that it was difficult for you to go through that experience. Did you consult with a professional, such as a psychologist, about what happened to you?

Palesa: Not yet, but I am going to.

Sibongile: Yes, please do.

Palesa: But I feel like it’s something that doesn’t bother me.

Sibongile: OK, sure?

Palesa: Ya, it doesn’t bother me. I have too much confidence in myself.

Sibongile: So, you feel that you’ve healed from the experience?

Palesa: Ya, by myself. I have healed myself. I don’t have to talk to someone about my problems. It is best to learn to deal with your problems by yourself and not rely on other people. What if those people are not constantly available when you need them? What if the psychiatrist that I consulted with dies, then I would have to find another person? What a task!

Sibongile: So, you would rather heal by yourself? Talking to someone who won’t judge you may help.

Palesa: To be honest with you, I would rather just forget about it.

Sibongile: Not everyone deserves to hear your story, because these are personal experiences about your life, you know.

Palesa: Also, I didn’t know that I was even being abused, because I was, I think, four years old then. So, it didn’t even hit me that much. I started being aware that I was being abused when I was sexually harassed by the teacher.

Sibongile: Where were your grandmother and mother at the time?

Palesa: They were at my home. The guy just called me when I was playing with my friends. I was innocent at that stage. What he did to me was the last thing I ever imagined.

(First interview, 1 January 2022)

**Being sexualised from a young age: effects of being sexually abused**

Palesa: I started dating when I was young. I think I was in Grade 4 or 5. I think it’s because of the abuse. I was exposed to adult stuff at a tender age.

Sibongile: So, you were sexualised from a very young age because of the abuse that you experienced?

Palesa: Yes.

Sibongile: What did dating mean to you at that age?

Palesa: Nothing serious really. It entailed kissing only. That was fun!

Sibongile: What was the response of your parents when you behaved in that manner?

Palesa: My mom would beat me.

Sibongile: Alright, did she sit you down and talk to you about why she was beating you up?

Palesa: Not really. She would just yell at me with frustration to stop being a naughty child. She stopped beating me in Grade 9. I think she realised that I was just messed up and that if she were to continue beating me up, it was going to be worse.

Sibongile: Messed up how?

Palesa: The things that I was doing. Being with men most of the time. I would not listen to her advice. Since then, things are now better. We are able to have a decent conversation with each other, and I do feel that she cares for and loves me.

Sibongile: It sounds like your behaviour was rebellious to a certain extent.

Palesa: It was. I was living my life the way I wanted to. No rules whatsoever. I just acted as I pleased.

(First interview, 1 January 2022)

**Reason for dating blessers**

Sibongile: I am interested in finding out how old you were when you first dated a blesser.

Palesa: Uhm, I was in Grade 10. I was 15.

Sibongile: Alright, was it intentional or did it happen by chance?

Palesa: It was intentional. I needed the money, still do. I would not say no to free money. Never.

Sibongile: Were there any expectations from the man that you were dating then?

Palesa: Obviously there was.

Sibongile: Please share with me if you are comfortable doing so.

Palesa: He wanted me to sleep with him, but unfortunately for him it never happened, because we never really had enough time to spend together. We were always on the road.

Sibongile: Going to?

Palesa: He used to transport me to the Saturday school and would then bring me back home afterwards. He was my source of transport.

Sibongile: It sounds then like it was more of a supportive friendship then?

Palesa: No dear. It was a relationship. I compromised by agreeing to oral sex.

Sibongile: Did you love him?

Palesa: I didn’t love him.

Sibongile: You agreed to be in a relationship with him because of what he could provide for you?

Palesa: Sort of. It was a convenient relationship.

Sibongile: I understand. How did you experience the relationship?

Palesa: It was good, but it just ended. I think it was because we were not spending enough time together.

Sibongile: From then on, did you see yourself dating much older and affluent men in future?

Palesa: Oh yes! Older guys are definitely my type. I love older guys, because I learn a lot from them. I get solid advice from them, unlike those kids. I know I won’t be able to get that from someone my age.

Sibongile: I understand. So, you get guidance and advice from them.

Palesa: Absolutely. I also appreciate that they don’t force me to do stuff that I am not ready for or feel uncomfortable doing.

Sibongile: So, there is a mutual understanding.

Palesa: Yes. Older guys are appealing to me. Since they have seen worse than I have seen, they are better able to cater for my needs.

Sibongile: May you please tell me about your most recent blesser?

Palesa: He is a 55-year-old white guy. He is a diplomat. He is originally from the United Kingdom.

Sibongile: Where did you meet each other?

Palesa: At a strip club. I used to work in the strip club.

Sibongile: Alright, how did it come about for you to plan to work there?

Palesa: It was about making money. I love money and I work for it.

Sibongile: Are you still working there?

Palesa: No, I quit. I worked for about five months.

Sibongile: What was the reason for quitting?

Palesa: I quit because the diplomat guy became my blesser. He told me that the strip club was too dirty for me. He calls me his baby girl. He told me to quit so that he could take good care of me. He gave me R1 000 just for a lift.

Sibongile: How has your experience with him been thus far?

Palesa: Good. Really good. White men have love. If you can find a white guy, nè.

Sibongile: Yes?

Palesa: White men are treasures!

Sibongile: That is wonderful.

Palesa: He is very romantic. The love is too much. He buys me flowers and everything that I need.

Sibongile: It seems like he is doing his best to make you happy.

Palesa: I suppose, but I don’t need flowers, I don’t even have a vase.

Sibongile: What do you appreciate the most about him?

Palesa: He gives me hard cash money. Every time when we go on dates, he’ll give me like R700, just for like being on a date with him. It makes a big difference in my life.

Sibongile: What do you use the money for?

Palesa: I do my nails, hair, and I buy clothes.

Sibongile: You spend it mostly on looking good.

Palesa: I must. I usually see him three or four times a week when he is around. He gives me more than enough. Sometimes he asks me if I would like to go out with my friends to places like Sun City or even Victoria Falls. He rented this beautiful resort in Sun City last year in December for the whole weekend. It was going for R5 000 a night.

Sibongile: He really spoils you, hey?

Palesa: Imagine the amount of fun that I had with my friends. It was epic.

Sibongile: Has he shared what it is that he appreciates about you?

Palesa: I love twerking. He enjoys it so much. He always tells me that I am his source of pride. Being seen publicly with a young, black and beautiful woman makes him feel good.

Sibongile: Do you see yourself having a future with him?

Palesa: He is just going to be my blesser until he dies.

Sibongile: He may live for another 20 to 30 years. Is he not saying anything about having a committed and serious relationship with you?

Palesa: He has asked me that question, but there is nothing we can do. He has a wife of more than 25 years, so there’s nothing that I can do. I am a 20-year-old, meaning that there is a 35-year difference between him and me. I do not think that it would make sense for us to get married.

Sibongile: I hear and understand the concerns that you are raising.

Palesa: It is not like he can divorce his wife for me. I’m not ready for him to be my husband – a husband that is going to be there for me for ten years and then dies.

Sibongile: Is there anything else you appreciate about your blesser even though he gives you money?

Palesa: The money that he gives me is what makes me love him. I love old men because they have money. I also appreciate that his demands are not too crazy. He easily gives me R1 000 for just being with him.

Sibongile: He has money and does not mind spending it with you.

(Second interview, 17 January 2022)

**Perception of marriage**

Palesa: There is a guy back home who is showing interest in me. He is a divorcee in his early 40s.

Sibongile: What are your thoughts pertaining to him?

Palesa: I find him attractive. He is the typical guy that I would go for. He is a lawyer, a lecturer at UJ and he drives a nice car.

Sibongile: So, you are considering being in a relationship with him?

Palesa: I date older guys. He could be a perfect match for me. He told me that he wants to marry me, but I am not looking to get married. You know people who are in marriages, yo! That is why my mom is not married. People who are in marriages, they … I don’t want to get married. I can have my own house and then arrange with my partner to see each other as we feel the need to do so. I am open to having kids, but not more than two.

Sibongile: Does it feel like marriage is stressful?

Palesa: I don’t believe in marriage. I can’t say yes to marriage, because you don’t have to use condoms when you are married. What if my supposed husband goes out and becomes infected with diseases? So, I will inherit those diseases just like that. I am not sure if I am ready for that life.

Sibongile: So, do you feel that it is safer when you are dating someone rather than when you are married to them?

Palesa: Yes. No control from the husband. When dating, I am still able to live 100% according to my terms and conditions. O gosh! Marriage! It’s tough out there.

Sibongile: Kindly explain what makes you say that.

Palesa: It is just that it is so difficult to predict men.

Sibongile: Human behaviour is so complex.

Palesa: Men and women are different species. Women are way better. I will just marry a woman. I will use men for babies.

Sibongile: It does seem like dating men is quite a complicated thing.

Palesa: It’s very complicated, because most of them do not know what they want. They want every girl. And if they have money and see a better one, they go for them.

(Second interview, 17 January 2022)

**Mother (and mother’s personal experiences of dating a blesser)**

Sibongile: Does your mom know that you are dating a man that is way older than you?

Palesa: She eventually found out. She wasn’t that uptight, because the guy was providing. Less job for her! My mom is so stingy. She doesn’t know that the guy is 55, though.

Sibongile: Oh really? How come you have not told her about his age?

Palesa: That will never happen. They will never meet. I cannot run the risk of them meeting, because I think my mom would be disappointed and puzzled about me dating such an old guy.

Sibongile: You intend keeping the details of your relationship a secret from your mom.

Palesa: I have to lie. I told her that my blesser is 40 years.

Sibongile: You were explaining that your mother was also dating a blesser at some point in her life?

Palesa: Yes. My mom’s second child was conceived from a relationship that she was having with a blesser.

Sibongile: It sounds like her relationship was serious.

Palesa: It was a serious relationship; it lasted about 12 years.

Sibongile: That is a long time. Was he a blesser, or someone who was taking good care of your mother because he had the means to do so?

Palesa: 100% blesser. He is married with three children, if I am not mistaken. My mom did not even tell him about the pregnancy. They stopped seeing each other.

Sibongile: Your mom clearly did not want him to be involved in the child’s life.

Palesa: I think that it was because she knew the boundaries of their relationship. By falling pregnant, she had overstepped that boundary and perhaps she was scared that her blesser was going to disapprove of the pregnancy.

Sibongile: It sounds like your mom’s experiences may have made it possible for her to be able to relate to your relationship with a blesser.

Palesa: Of course! But imagine being in a relationship with someone for 12 years whilst not being promoted.

Sibongile: I can imagine that even though the blesser was supporting your mother financially, perhaps it was not easy for her to be in that situation, as you mentioned that she remained a girlfriend for all those years.

Palesa: Not at all.

Sibongile: Overall, how would you describe the relationship that your mother had with the blesser?

Palesa: Initially I did not know that he was married, because he was constantly with us. I really thought that he would marry my mother because of the things that he was doing for us.

Sibongile: Are you able to mention the things that he was doing for your family?

Palesa: It is a lot, but the most important ones were that he used to pay my mom’s tertiary fees, he used to buy us groceries and would take us out for entertainment.

Sibongile: He was supportive and present.

Palesa: Very much so. He was the type of blesser who ensured that we never went to bed hungry. My mom finished in record time at the university mainly because of the support that she was getting from him.

Sibongile: It is great, though, that your mother is now independent and does not need to rely on a blesser for financial support.

Palesa: I totally agree. Thinking about it now, I think that my mother separated from him because maybe she was tired of dating someone who was married. I also do think that she wanted another child because she wanted someone to hold on to. She saw that I was troublesome.

(Third interview, 24 January 2022)

**Expectations/experiences in relationships: concurrent multiple relationships**

Palesa: When I get into a relationship, I am the one that always ruins it. I am not used to being in a monogamous relationship, but I am going to try.

Sibongile: With whom are you planning to have a monogamous relationship?

Palesa: It is a tough decision to make, because I really cannot let go of my diplomat guy.

Sibongile: What about Mongezi?

Palesa: He also has other girls.

Sibongile: How come?

Palesa: He just loves women. So, he has other girls on the side. He has a yellow bone. I only know about her.

Sibongile: So, he confided in you that he is seeing someone else?

Palesa: Yes, and I am good with it because he told me in detail about their relationship.

Sibongile: When did he tell you that he is seeing someone else whilst being in a relationship with you?

Palesa: He told me the first two days that we were together. He even suggested that we have a threesome. I did not object to that.

Sibongile: Really?

Palesa: It would be something new for me. If I am protecting myself, I see no issues why I should not try it out.

Sibongile: Since you are in love with Mongezi, does it mean that you will end your relationship with the diplomat guy?

Palesa: For what it is worth, I will always have the diplomat. Every guy has to know there’s a diplomat who once bought me an iPhone 11. He spent like 20 000 on me in one day.

Sibongile: That is a lot of money!

Palesa: Of late, he does not spend less than R1 000 on me when I am with him.

Sibongile: He likes to spoil you, hey?

Palesa: He doesn’t even feel that he is spending that much on me. I even know his bank card pin.

Sibongile: That implies that for as long as you are with the diplomat, you will always have more than one partner?

Palesa: I am not sure if I told you this, but there is a young, successful black lawyer who is also an academic. He is very interested in having a relationship with me.

Sibongile: What are your thoughts pertaining to his interest?

Palesa: I like him more for his money. I mean, I would be able to upgrade myself even more or further if I consider being in a relationship with him. You know, double up on what I am already getting from my blesser, meaning that I would have two blessers.

Sibongile: What about Mongezi?

Palesa: He will always be the love of my life, but if the lawyer guy decides to get me a ring,

I am not going to reject it.

Sibongile: Okay.

Palesa: I have improved, though. I mean, I have downscaled to two to three men at a time. I used to do about five men at a time.

Sibongile: So, what were you doing with all these people?

Palesa: I was going out and having fun with them.

Sibongile: Were you enjoying their company?

Palesa: Ya. Just going out and then afterwards we go to the guy’s place, and then we have sex, and he brings me back tomorrow. Just that. I think I’ve had my fun time. I have had it.

That is why I want to focus on my books now.

(Second interview, 17 January 2022)

**Protecting self and others in relationships: use or not of condoms**

Palesa: Girl, I am so happy today. Guess what?

Sibongile: What?

Palesa: I was with my man after being celibate for a whole month.

Sibongile: You are funny, you know that. So how was it to be reunited after a month?

Palesa: I had not seen him since the day I had an episode. I was with him when I got sick.

Today I saw and felt heaven with all my five senses.

Sibongile: Please share with me what happened?

Palesa: We had the most special love-making time that I can ever think of in my entire life.

Sibongile: Oh ... Mongezi does really make you happy, hey?

Palesa: He does. Only, he didn’t want to use a condom.

Sibongile: Really?

Palesa: Ya, and you know that I am sick.

Sibongile: Yes.

Palesa: I told him that no ways am I going to be intimate with him without his using a condom. He kept on trying to convince me, but I kept to my word. He then searched his car until he found one. He knew that we were going to do it, so I would have been surprised if he did not have any.

Sibongile: I am glad that you were able to enforce your limits.

Palesa: Yes, so we used the condom without any issues and still enjoyed being intimate with each other.

Sibongile: OK lovely. That’s good.

Palesa: Ya, it scared me a lot, because it was the first time he insisted on not using protection.

Sibongile: What scared you the most?

Palesa: I was caught off guard; scared of the possibility of infecting him.

Sibongile: But you also don’t know his status, right?

Palesa: Yes, maybe he might be saying that he wants to fuck me, knowing very well that he is sick.

Sibongile: For now, you do not know.

Palesa: Men … cannot trust them. All of them! You see why I need a condom? That is why I love women.

Sibongile: It may also be that he does not know his status.

Palesa: Some people do not care up until they experience severe symptoms, some of which may be fatal.

Sibongile: Hence it becomes so pivotal to know the status of yourself and your sexual partner before engaging in any sexual acts.

(Second interview, 17 January 2022)

**Challenges of disclosing HIV status**

Palesa: You remember I told you about how Mongezi was trying to have sex with me without a condom?

Sibongile: Oh yes, I do remember.

Palesa: The nerve!

Sibongile: What thoughts are coming to mind now?

Palesa: The issue of disclosing my status … I will have to do it some day or the other. The thought makes me feel so scared.

Sibongile: How come?

Palesa: I do not want to be rejected. Imagine if I disclose my status to Mongezi and he decides to reject me. I would die!

Sibongile: Do you know his status?

Palesa: No, I do not, and I cannot trust him, because he was seeing a yellow bone. I also told him about my blesser just to spite him, but I later told him that I was lying.

Sibongile: How did he respond to that?

Palesa: He was shocked and told me that he does not want to be infected with HIV. He warned me to stop dating other girls or else he would end our relationship. Little does he know that I am already sick.

Sibongile: As you were mentioning that you may have to disclose your status at some point, how are you going to navigate that?

Palesa: Navigate what?

Sibongile: Disclosing your status.

Palesa: Oh! I wish not to find myself in that situation. But I will have to, I guess, if the relationship with, for example, Mongezi becomes serious. I cannot disclose to any tom, dick and harry.

Sibongile: That sounds sensible.

Palesa: I fear being humiliated by people in public for my status. What if I disclose to someone who does not care about protecting my sanity and dignity. I do not want to be a laughingstock. So, I have to make sure that I disclose to someone who truly cares about me.

Sibongile: You will take a graded approach to disclosing your status?

Palesa: Ya.

Sibongile: OK, but you also need to know your partner’s status. It’s not only your status that needs to be checked.

Palesa: I just do not want to force the testing issues for now. What if I do, only to push Mongezi to be curious about my status?

Sibongile: Are you rather going to keep quiet about it?

Palesa: For now, yes, and I promise to always use protection when being sexually active with him.

Sibongile: I hear and understand your concerns, Palesa. It is important that you continue to maximise your health and safety as well as that of your partner.

(Third interview, 24 January 2022)

**Academic exclusion: repercussions of dating a blesser**

Palesa: My blesser, the diplomat, he makes the pots! He is my everyday sunshine.

Sibongile: Sounds like he goes the extra mile for you.

Palesa: All the time. I know that I boost his ego. Being seen with a young, beautiful, black woman is all that he needs, and I am there for that.

Sibongile: Please explain to me the lifestyle that he provides for you.

Palesa: Oh baby! He takes me to classy, exquisite restaurants. The guesthouses that I have been to with him are breathtaking. Let me show you a few pictures from my phone. See?

Sibongile: Oh! These are beautiful.

Palesa: Drakensberg, Stellenbosch, Kimberley. I would not say no to this life. Never!

Sibongile: Does your blesser have expectations of you?

Palesa: He is not fussy at all, but he does expect me to see him a minimum of two days a week and to be with him on weekends if I am not too busy.

Sibongile: Sounds reasonable.

Palesa: I get too tempted and end up being with him three to four times a week, even on weekends.

Sibongile: Alright, but you seem concerned.

Palesa: That is a lot of time, because I would usually meet up with him around 18:00 immediately after he knocks off, only to come back to my place just before midnight. No, that must stop.

Sibongile: What makes you feel that you need to stop that behaviour?

Palesa: It deprives me of focusing on my books. That is the main reason why I am excluded. Eish!

Sibongile: I understand that you are saying that the life that he was providing you with was irresistible, but how are you going to manage the demands of your private life and academic life? We are hoping that your appeal will be successful.

Palesa: I am going to move back home. I will travel daily, which is fine. Home is a lot quieter, because I do not go out that much. I will be better able to resist temptations, because my mom will be keeping a close eye on me.

Sibongile: Sounds like you have given much thought to the decision to study whilst staying at home.

Palesa: I had to. I was also able to be honest about my weaknesses. My issue is that this side is too fast for me. I cannot control my desires so well. If a person says there is a party somewhere, I dress up, apply my make-up, and off I go.

Sibongile: Even if you have an upcoming test or exam?

Palesa: Yes, I am very bad at making decisions when it concerns men or parties. I will have to work on it.

(Second interview, 17 January 2022)

**Making money through transactional sex has been normalised**

Sibongile: I am interested in finding out what your thoughts are about true love.

Palesa: Interesting question! Look, what I have now with Mongezi is unique. I love him for who he is and not for what he has. I think that what we have is true love.

Sibongile: That is sweet. Do you envision a future with Mongezi?

Palesa: That is where the problem is. Despite really loving him, I worry about how he can sustain himself.

Sibongile: Please explain further.

Palesa: I think that he is selling dick.

Sibongile: Really?

Palesa: Yes. My gut feel tells me so. Also, when I was with him, a lot of girls were calling him.

Sibongile: Why do you think he would do that?

Palesa: I guess the money that he makes out of that helps him to take care of his bills.

Sibongile: How does that make you feel, though?

Palesa: If those women in Centurion whom I am suspecting are giving him good money plus he would be getting sex because he loves it, then who am I to complain?

Sibongile: Do you feel like you do not have a say in how he lives his life?

Palesa: I feel that my say won’t be important, because the money that he makes (if my suspicion is correct) would make a big difference in our lives. I do not think that I have told you, but he is a bodyguard at some club in town. I do not think that he makes a lot from his work.

Sibongile: Do you think that if your suspicions are true, that it would be a healthy and safe relationship to be in?

Palesa: Why not? I will continue to insist on protecting myself during lovemaking. Besides, I do not mind a lot of things. I use common sense. Why should I worry if, for instance, he is getting paid R1 000 for a round, when that’s something for him and me, because I need to do my hair. I don’t have money, but at least I can benefit from what he is getting.

Sibongile: You are expecting him to support you financially?

Palesa: I cannot allow him to have sex with me for free. Just like that! He will take me for granted. He needs to try to take care of me. I always appreciate what he can do for me. I also just want to mention that Mongezi is one of a few people that I have been with that gives me hope, because he has never abused or hurt me in any way.

(Third interview, 24 January 2022)

**Coping strategies for dealing with past traumatic experiences, however self destructive: partying and drinking alcohol excessively**

Sibongile: I would like to understand what it is about living a lifestyle that is provided for by the blesser that is appealing to you.

Palesa: I appreciate and enjoy the breaks that I get out of my life.

Sibongile: Breaks? May you please elaborate further.

Palesa: I get to party as much as I can. I get to party in lavish, classy clubs. Before I met him, I was restricted from partying on days when I really felt like, it because of a lack of money.

Sibongile: How do you feel when you party?

Palesa: Happy, because it releases all of my stress in that moment. I forget about anything and everything that hurts me. I forget about my problems.

Sibongile: Of late, what would you say was the main thing that you wanted to forget about?

Palesa: Failing. That made me feel inadequate. I was panicking. So, partying made it easier for me to deal with the situation.

Sibongile: Do you know what made you to fail?

Palesa: It sounds stupid, but I failed because I was not studying enough. I was partying a lot.

Sibongile: Besides trying to cope due to not doing well at school, is there any other reason that may have contributed towards the lifestyle that you were living?

Palesa: Eish, stuff that has happened to me in the past. I just do not want to talk about it now.

Sibongile: That is completely fine. Please remember that you are not compelled at any point to talk about issues that make you feel uncomfortable or distressed.

Palesa: Ok. To be honest, I do regret not giving my books enough time and attention, because I know that when I do, I get great grades.

Sibongile: If I am understanding you correctly, it seems that you use partying as a way of distracting yourself from dealing with stressful situations in your life.

Palesa: Yes but talking about it now makes me feel grateful for those moments of bliss that I had. No one will ever take away from me my joy. I needed to party and maybe might continue doing so, as it takes my mind off things.

Sibongile: Would you by any chance consider being seen by a psychologist so that you may start thinking about how to process your experiences in a non-sabotaging and nondestructive way?

Palesa: The thing is, I love dealing with my problems. I know that you are probably thinking that what I was doing was not helping at all, but I would rather fight this battle by myself.

(Third interview, 24 January 2022)

**Peer pressure**

Palesa: There is a lot of pressure in varsity. You would see other kids wearing trendy and fancy clothes whilst they also eat at and buy from expensive restaurants. Imagine if you are constantly eating noodles because that is what your mom can afford. It simply means that you would have to go and look for men so that you can be on the same level. That is not nice at all.

Sibongile: Sounds like it is inevitable to feel the pressure because of the type of lifestyle that other students are living.

Palesa: Peer pressure can be overwhelming.

Sibongile: Was that the reason you agreed to be in a relationship with an older, affluent man?

Palesa: Mostly yes, but I am also keeping him because I genuinely feel that he cares for me.

Sibongile: That is wonderful to feel that way.

Palesa: Yes, it is. He told me a few days ago that he is going to buy me the latest iPhone. iPhone 14 plus. Let me show it to you.

Sibongile: It looks beautiful. I can imagine that the features are extraordinary.

Palesa: Oh man! This is what I am talking about, baby! My blesser and I will be separated by death. He is my treasure.

Sibongile: With all that your blesser is doing for you, I can imagine that you are less likely to experience the effects of peer pressure because of having the means to live up to a trendy and fashionable lifestyle without any struggles.

Palesa: You would be surprised. Maintaining that lifestyle is costly, because trends hardly last for a long time. So, keeping up is no child’s play. I do it because of the status that I want to keep for life and the people I want to attract.

Sibongile: Please elaborate.

Palesa: So, before I met with my diplomat guy, I was already using an iPhone 12. When we started dating, he had a clear picture of the kind of girl that I am and my overall taste.

That means that he needs to upgrade me from where I am. If not, then there is no point in being with him.

Sibongile: So, it is about maintaining a high standard for yourself?

Palesa: Always and attracting men that are in my league.

(Third interview, 24 January 2022)
