# Supplementary material
Source: Research Square preprint supplement (doi:10.21203/rs.3.rs-8738924/v1)
Supplement: Supplementary file 3 [file c80f07b97571e3549af3e4a8.docx]

**CHAPTER 5**

MBALI

The following are excerpts from the discussion between Mbali and Sibongile:

**Hook-ups and their emotional impact**

Mbali: A friend of mine who is a classmate with whom I shared my story, told me that she had a solution for me. She explained what hook-ups all are about. She told me that it entailed meeting with someone, having sex with them, and then getting paid afterwards.

Sibongile: Is it meant to be a once-off encounter?

Mbali: Yes, it is meant to be a once-off sexual encounter. As I was contemplating whether I should do it or not, I was constantly reminded of the penalty deadline. I had to pay the penalty fee by 15 December. I cried, as I felt that I couldn’t do this thing of hook-ups. But then I just decided that since I had no other option, I would do it. So, I had my first client. He was so old, sjoe!

Sibongile: Oh Mbali, it must have been difficult for you.

Mbali: Extremely difficult. He was way older than me. He offered me R1 500 for one night. He was as old as my father, but I felt compelled to have sex with him, because I had to pay the penalty fee or else I would be excluded from the university. I went to his place using Uber services. He stayed at Pretoria West. He had sent me the location of his place. I arrived just after 7.

Sibongile: At night?

Mbali: Yebo, ebusuku [Yes, at night]. So, we did what we agreed upon, but by 9 pm I wanted to go because I was no longer feeling comfortable.

Sibongile: Please tell me more about what was making you feel uncomfortable.

Mbali: What happened that night is one of the contributing reasons why I don’t even want to date. I really regret what I did. My hook-up partner agreed that I could leave, but he said he would not give me the entire R1 500, because I bridged the terms of our agreement. The agreement was that I would stay the whole night. So, he told me that he would give me R600. I told him that it was fine, but emphasised that I wanted to leave.

Sibongile: Understandably you were not at ease to spend the entire night with a stranger on that basis. Did he give you the money as promised, though?

Mbali: Yes, he did. Again, I used an Uber to get to res. As soon as I arrived, I took a shower for hours. Not interested in watching series that evening, I went straight to bed, but found myself tossing and turning the whole night. I did not sleep a wink. I felt like I had betrayed my body by doing something that I was not supposed to have done.

Sibongile: I empathise that it must have been an unpleasant experience. I am interested in finding out how your friend knew about ways of accessing potential hook-up partners.

Mbali: They have WhatsApp groups. They are also on Facebook.

Sibongile: So, they operate on social media platforms.

Mbali: I wonder why such groups even exist. The act of sleeping with someone – with a stranger – for money just eats up the soul.

Sibongile: I can imagine, but as you were explaining, it was a challenging situation that made you to think about joining such platforms for making money.

Mbali: Even before meeting with the guy, I felt a lot of shame. One of my biggest fears was getting someone that was from the same village as myself. I just thought that I would kill myself if that were to happen. To protect my identity, I used my spare phone to create a separate WhatsApp account. Feelings of shame and terror consumed me. The expectation is that you need to say who you are. However, that is not compulsory. It is compulsory that you say where you are located and your age, and state how much it’s going to be per night. I just could not do it, so my friend posted the information on the group on my behalf. She saw that it wasn’t working out on Facebook, so she continued on WhatsApp. She advised me to send or upload my picture.

Sibongile: Sounds like your friend was determined to get you a hook-up partner.

Mbali: She kept me calm and reassured me that there was absolutely nothing that I needed to worry about, since it was older men on the group and that chances of them knowing me were slim. Even if it so happened that they knew me, there wasn’t much that they could have done to me in any case. So, I started chatting with a guy who required of me to send him my nudes.

Sibongile: Oh! How did you respond to such a request?

Mbali: I kept on replaying in my mind the process that I would have to go through. I do not even take nudes of myself. It is a practice that I have no time for. The thought of it makes me feel scared. That was absolutely the last thing that I would have done. When he realised that I was not sending the pictures, he started insulting me. I just blocked him on the spot. Then there was another guy who was acting as a middleman. He told me about a man that was interested in me but had specific requirements. I told him that I would not be able to meet those requirements. He also insulted me.

Sibongile: What was he requesting?

Mbali: He wanted me to spend my weekends with the man, meaning that I would go back to res on Mondays.

Sibongile: Sjoe, he was requiring you to sacrifice most of your time so that you could be with him.

Mbali: Imagine! Every weekend! Also, during the week when he wants me to be with him, he needs to be able to get hold of me. No matter if I have an exam or test or an assignment. I decided that I would not be able to hook up any guys, because when you tell them that you wouldn’t be able to do something that they are requesting, they insult you and make you feel like trash.

Sibongile: It sounds like potential hook-up partners are quite ruthless.

Mbali: Yes, they call you all the terrible names in the world. Maungana nhlitiyo [If you are not resilient enough] you can end up killing yourself, just because of the insults that would be hurled at you because you refused to do what they were requesting from you.

Sibongile: I am so glad that you were able to walk away from that platform without taking to heart whatever it was that they were saying to you.

Mbali: I am also glad. They also don’t want to be kept waiting. If you were to say that you are still thinking about what they had asked from you, the person would ask what exactly you are thinking about.

Sibongile: Quite impatient, and they do not mind treating you badly.

Mbali: I got a sense that they are accustomed to treating women in a disrespectful manner. It’s like you are their object. They want to call the shots all the time. They really objectify women and don’t expect them to have a say in anything at all. Basically, they just don’t care. Till this day, I only slept with that guy, but I just feel somehow ...

Sibongile: How do you feel?

Mbali: I feel like there’s someone who can help me to cleanse myself from the inside – just to clean up my mind and remove the thoughts and memories of what I had done. When this topic is being spoken about, I feel like it is directed towards me. At times I tell myself that if I had asked for money from certain family members, perhaps they would have assisted me, but I know that there was really no one to help me at that time, because it was already late as people were busy preparing for the festive season. So, there was hardly anyone who would be able to assist me.

(First interview, 25 February 2022)

**Student blesser**

Mbali: So, I ended up deciding to go back. But the one that I met up with was a student from here. He asked me why I was doing such a thing, because I could talk to people and ask help from them.

Sibongile: The student was asking you?

Mbali: Yes. I told him that he does not know my situation and that he should not be asking me a lot of questions, because even if I were to tell him, he would judge me, nonetheless. He told me that he would give me R800 only if I were to agree to be available whenever he requested me to avail myself. I asked him if that entailed any day. He said yes.

Sibongile: Oh really. Did you consider his proposal considering that “any day” had no end in sight?

Mbali: It meant that when he felt like he wanted to be with me, then he would call me, just like that. I told him in a polite way that shem, angeke ngikhone [I would not be able to consent to his proposal] because this thing must be once-off. So, he told me that if it’s a once-off, then he will give me R500. I agreed. But when it was time to be in the act, I just cried and said that I really would not be able to do it. He asked me why it was that I left my place to come and be with him, only to waste his time. At that point, I decided that it was best for me to leave, so I just left. I was feeling hurt and disappointed, because I left with the same problems. The money was still not enough, and I still needed to get money for food.

(First interview, 25 February 2022)

**Relationship with a blesser**

Mbali: As I was walking to res, I noticed a very beautiful car. The car was moving along very slowly towards me. The guy driving started a conversation with me. He told me that I made him happy, but I knew that he was lying because he did not even know me.

Sibongile: Seems like it was a random encounter. What exactly did he say to you?

Mbali: He said my looks and my walk made him feel happy. He said that he saw me from a distance and immediately slowed down to have a better view of me. I just knew that he wasn’t for real.

Sibongile: You probably felt that way because he does not even know you?

Mbali: Yes, I know that he was trying his luck with me. He then asked for my cell phone number so that we could talk over the phone. What came to my mind was what if he was a blessing in disguise and what if he would help me pay for my fees? Without any further hesitations, I gave in. He told me that he was staying in Soshanguve and that he was working as an advocate and had his own law firm. He called me that same evening. He asked me if I had dated an older guy before. I told him that I hadn’t, because in reality that was the case. So, he was like, “Okay, if you agree to a date with me, I will do whatever it is that you want me to do for you. Whether it’s clothes, money, entertainment – you name it.” Sibongile: What an enticing proposal. How did you respond to that?

Mbali: Very enticing! I asked what it is that I needed to do in return if I were to agree to his proposal.

Sibongile: Right! How realistic of you.

Mbali: I asked, because there is nothing for free in this life.

Sibongile: So, did he give you clarity on your question?

Mbali: He told me that he would require of me to sleep with him and that he would require me to avail myself to go to places that he wanted to go with me. He said he doesn’t care if

I’d be busy with my schoolwork or whether I’d be staying with my parents or whatsoever. When he wants me for example at 10 pm to go with him to a certain place, I need to agree and meet up with him. He also explained that when he would give me money to buy certain clothes, I need to strictly buy those clothes so that I can look presentable for the place that we are going to. I told him that I needed to think about that. So, I thought to myself that this guy can actually do whatever it is that I ask of him. Based on what I could benefit, I agreed. I would be able to add to the money that I already had, and I would be able to pay the amount/fine. The first time he did not sleep with me, but we went out to a club. Before then, I had not been to a club, especially a club in Pretoria. Yo, I was not comfortable! You know when your body language shows that you have been forced to do something that does not sit well with you.

Sibongile: Yes?

Mbali: That was the case. A club is not really my scene. I believe that it really has its own people.

Sibongile: That is true, since people have unique tastes and preferences.

Mbali: You just get a sense that there are some people who fit nicely in clubs. So, prior to going out to the club that night, he gave me a gift card that was already loaded with money for my use to buy items from stores.

Sibongile: He was living up to his promises. How was that experience for you?

Mbali: Relieving and reassuring, especially when since he was unknowingly going to help me pay off the penalty fee. So, then I bought an outfit; the other money I used to buy clothes and shoes for my siblings.

Sibongile: For your siblings? That is so caring and thoughtful of you.

Mbali: I know that they will appreciate it a lot. So, he came to fetch me where I was staying, then we went to the club. Remember that he had given me the money that I wanted, and I was wearing what he wanted me to wear.

Sibongile: Really! How did you know what he wanted you to wear?

Mbali: He used to tell me that I needed to buy this kind of clothing item. He even bought the weave. Well, I don’t wear weaves. He also bought some of the clothes by himself.

Sibongile: He was the one buying?

Mbali: Everything including the jewellery. So, I had to wear those things. Even the big round earrings. He even paid this other lady to make me up, but I told him that my skin disorder doesn’t want anything that has perfume or make-up in general, because it becomes itchy. He understood and we prepared ourselves to go to the club.

Sibongile: So, you were wearing the earrings, outfit and weave?

Mbali: Yes. When we arrived at the club … It’s their thing, for the people that are in his circle, to go for students. Because when we got there, we found his colleagues (or they are his friends) chilling and we joined them. I just noted that those men were old. They are men who have their own homes and families. The way that some of them were old, I imagine that I am the same age as their children. I could tell that some of the students there were younger than me.

Sibongile: But did he at least tell you that you would be meeting with his friends or colleagues where you were going to?

Mbali: He does not tell you anything.

Sibongile: So, you would basically find the set-up ready for you.

Mbali: Yes, he was even telling me how I needed to behave.

Sibongile: How did you respond to that?

Mbali: I complied, but I could feel that he was controlling me.

Sibongile: I understand, completely.

Mbali: So, the first night we went to the club. I can’t even remember the name of the club, because it was at night. We went and then he drove me back to res. He explained that he had a client that was based far away the following day.

Sibongile: So, he dropped you off at the res at night so that he could prepare for the next day?

Mbali: Yes. So, I thought to myself, this guy has given me money, and I was able to pay the fine; I was even left off with some change which enabled me to buy food and even clothes. So, what else do I need from him?

Sibongile: Engaging in a process of reflection enabled you to decide on how you wanted to live your life going forward.

Mbali: I blocked him. I blocked him on WhatsApp and on calls. He called me using a number that I did not know. I answered because I did not know who it was. I said “Hello” and he was like, “Ya, you’re behaving like a clever.” The moment I heard his voice I became so scared. Ngathi ngafa mina [it will be the death of me]. He said, “You are making yourself out to be like a clever.” I was like, “My sincerest apologies.” I told him that my phone was having problems. He asked me why it was that I didn’t tell him. He told me that he would buy a new phone for me and deliver it that very evening. I just thought to myself, how would I be able to run away from this guy? Because he was beginning to make me feel stifled.

Sibongile: Also, because he had spent quite a lot of money on you, so perhaps he may have felt he did not want to part ways with you that soon.

Mbali: People break up in relationships all the time. Perhaps he felt like he was owning me.

Sibongile: That could have been the case.

Mbali: Fortunately, at my res it’s not like at the communes, where he could just get in without my permission. He would need to sign in first and the security guards would need to notify me of the visitor. I stayed the whole of November indoors in my apartment. Other students even thought that I had already left for home. I was just scared that should I get out of the premises; I might find him waiting for me.

(Second interview, 4 March 2022)

**Peer pressure**

Mbali: I won’t say that my situation had valid grounds for me to end up being with a blesser, whereas others’ situations don’t. But others make me wonder whether they love themselves enough or not.

Sibongile: What makes you say that?

Mbali: Imagine being spotted with an old man just because you want clothes. When I look at most of the girls, even the ones from home, they are doing it because they want to keep up with the trends. The thinking process is that one needs to trend, always. For example, one would always want to be using the latest iPhone. We just like things as girls, a lot.

Sibongile: What do you think is driving this, though?

Mbali: I think that it is peer pressure, especially from social media.

Sibongile: Is there a particular social media platform that you think is driving such thinking processes?

Mbali: Instagram! When you look at the quality of the pictures that are being posted, you can tell that it is of a high standing. The places and restaurants are of a high class. It leads to one experiencing pressure which may even lead to misery, because even if I were to think of working part-time, I do not think that the money would be enough to maintain the luxurious lifestyle, because I would still be studying.

Sibongile: So, one may conclude that indeed it may not be enough.

Mbali: Peer pressure creeps into one’s life in a subtle manner. Associating with students who regularly go to clubs would mean that one would be accustomed to that life one way or another. It is easy to be exposed to blessers at clubs, because that is where they usually hang out as they look out for young women. I think that once one is accustomed to that life of being provided for and getting free money, it would not be easy to cut ties with blessers.

Sibongile: Do you think that the money provided is for free? Even if the young woman would be expected to sleep with the blesser?

Mbali: That is the problem, because it is obvious that if the young woman does not consent to the blesser’s requests, then she won’t get money from him.

Sibongile: True, the money provided is not for free. As a follow-up question, I am curious to find out if there was a time in your life when you felt pressurised by your peers?

Mbali: Yes, especially around the time when we had to go back home for recess in December. What I used to do in my first year upon receiving my monthly allowance from NSFAS, which was R1 500, I would send R1 000 home so that they would be able to buy essential items. I was doing so, because the money that was earned by my mom was not enough. I would be left with R500 to buy groceries. And that would basically be it for the month.

When December came and it was time for me to go back home, I would think to myself that I had not even bought myself a single item of clothes. Nothing!

Sibongile: Would it be stressful to think of going home for recess?

Mbali: Very much so. Sometimes I would wish to visit a place where I was not known, because I would really have nothing to show in as far as fashion and all the trendy things were concerned. I honestly felt the pressure then. I knew that there was no way that I could buy what others were seemingly able to afford. The friend that I cut off advised me to open an account, but I had already told myself in high school that I won’t open an account for clothes, especially if I was unemployed.

Sibongile: Sounds like, in acknowledging your challenges, you were better able to accept your reality, which became a protective factor, as you were not easily swayed to measuring your life against others.

Mbali: Though that was not easy at all. I just told myself and my friend that I would never do it, and she told me that other students are wearing nice clothes because of the clothing accounts that they had. She tried to convince me that other students are able to pay the clothing accounts on time. However, I knew that I would never be able to pay the account, especially because it has interest.

Sibongile: How were you able to navigate going back to your home for recess even though you did not have new clothes?

Mbali: So, when I went back home in December in my first year, people were enquiring where I had been, because there was no difference with regards to my physical appearances.

Sibongile: Who would ask such questions or make such statements?

Mbali: It would be my peers. The people that pressurise us the most are people that we live with. People would probably ask themselves what was actually going on with me, but deep within myself I was happy.

Sibongile: What was making you feel happy?

Mbali: The fact that I had passed my first year, and that my family were not suffering whilst I was at school.

Sibongile: That is good.

Mbali: But there was just always that pressure that at least I needed to come back even if it was with one new dress. So, 90% it would just be that and 10% would be pressure from my friends. But it doesn’t matter anymore. I know that God has a plan for my life and that it will come to fruition. I have realised that with peer pressure, it’s not a matter of pleasing ourselves. No! We do it because we want to please our friends and the people that we are close with. Most of the times, pressure emanates from friends, the ones that we are close with. The thinking is that I don’t want so and so to be above me. That life is not worth it.

Sibongile: I am glad that you are at a stage in your life where you have realised that giving in to peer pressure would not add any value to your life. Instead, one can wait for a time when they are able to afford to buy all that they need and desire for themselves, instead of having unrealistic expectations from themselves and others.

(Second interview, 4 March 2022)

**Reflections on the choice of friendships**

Sibongile: From our discussion thus far, I am gathering that it is crucial to assess and evaluate whether the company you keep is good or not good for you.

Mbali: I cannot overemphasise how key it is to choose friends that have the same values and morals as yourself. After the dramatic turn of events at the lodge, my friend and I went home. When we arrived home, it finally hit me that I was in real danger. My friend explained that that night I was going to sleep with the other guy, and she was with the other one. That was so scary to hear.

Sibongile: What came to your mind when your friend told you that?

Mbali: I knew in that moment that I would not be able to trust her again, because I felt betrayed that she had withheld important information from me. The guy that she was referring to had tattoos all over his neck and visible parts of his hands. One could tell that he was a gangster. Soon after sharing with me what the plan was, she came back to apologise for leading me to those people and for leading me into that situation. She explained that it was not supposed to have happened. I told her that it was fine and that perhaps that was the lesson that I had to get in life.

Sibongile: I agree that your friend could have at least involved you in what she was planning.

Mbali: She did not, because she obviously knew that I was not going to agree to that. I am reminded of another friend of mine who cut off a friend of hers because she felt ukuthi la uyakhome impilweni, ila ngingayi khona mina. So uzongidelaya ukuthi ngifeke la engiyakhona [that the path she was choosing for life was not aligned with her friend’s path, meaning that if she were to continue with the friendship, she would inevitably delay herself from arriving at her destination].

Sibongile: Precisely!

Mbali: I also cut off this other former high school best friend of mine. She told me that I was acting like an old person.

Sibongile: What did she mean by that?

Mbali: She goes out to clubs and parties each weekend with friends. I excluded myself from that life.

Sibongile: Clearly, your interests and perspective on life differed significantly so.

Mbali: We were growing apart fast. She told me that she was still young and therefore had to enjoy herself to the fullest. She further told me that my life was boring, because according to her, I was living my life as a grandmother. I really did not care much about that, so then I decided to cut her off. I later realised that she was in so much debt because of trying to keep up with others’ lifestyles.

Sibongile: Seems that peer pressure can be overwhelming at times.

Mbali: It is sad, because she ended up borrowing money in January so that she could buy an iPhone 12, which is very expensive. Before buying an iPhone, one needs to consider that it is not all about monthly instalments. There are also iTunes, iCloud and other accessories as well. Those accessories require money. I asked her why she bought an iPhone when it was so costly. She said it was because all people that she was hanging out with had iPhones and that she was the only one with a Samsung, which made her feel like an outcast in the group.

Sibongile: Trying to fit in can be so costly.

Mbali: So, I asked her if it was really worth it getting herself into serious debt because of an iPhone, because if you don’t fit in within a particular group, then one needs to seek elsewhere where they fit in or surround themselves with people that will let them be themselves, not people who will want them to change and be like them.

Sibongile: But it sounds like, as a person, one needs to sit down and do introspection by asking themselves whether what they are doing is worth it or not. As a university student, your future is already looking bright. I mean, one can convince themselves to be patient with themselves for the next three to four years.

Mbali: All things that I felt I was getting behind with, I will be able to do as soon as I start working. Even the pressure of having to go to clubs, I’ll see it when I’m done with school, because right now I’m focusing on my due dates.

Sibongile: I can imagine that your schedule as a university student is busy and that you need to utilise your time wisely.

Mbali: That is why students end up being excluded from universities. It’s not that one is dumb or incapable of doing well. It’s just that a person would not be giving themselves enough time to spend on their studies.

(First interview, 25 February 2022)

**Social media**

Mbali: Before, I used to feel pressure that my peers are wearing beautiful clothes and I am not, but then I realised that some ladies would be advertising a brand, whilst others would post on social media just to brag or to prove a point. Usually that results in us girls having a competitive spirit, whereby you feel that you do not want to be outclassed by a certain person. For example, these days Brazilian hair is the one that is trending. I can buy it, wear it, then post myself wearing it on Instagram or Facebook. So, the people (students) that live close to me may experience pressure as they do not want to be outclassed by Mbali, then the person will start buying it. Another example: If I buy an Air Force sneaker, my peers might feel that it’s impossible to be outclassed by myself, and they might end up buying themselves the sneaker. So that is the spirit. But that spirit may make one to end up buying something that is clearly beyond what one can afford, for example an iPhone 12. How can an unemployed student afford such? So, it would mean that they would need to get the money from a blesser or from hook-ups so that they may be able to afford to buy the iPhone 12. The spirit is that one does not want to be outshined. The buying of these luxurious items is merely to prove a point, and is not necessarily because one likes these things.

Sibongile: So, who would you be proving a point to?

Mbali: The people that we are living with. They need to feel your presence through the material things that you can afford or have.

Sibongile: Oh, so does that mean that a person is appreciated more based on the materialistic possessions?

Mbali: It is a sad reality, because people are equating a person’s worth to their materialistic possessions. The competition is so rife, because we don’t want others to appear to be of a higher status than us. Therefore, social media is constantly driving that competitive spirit.

Sibongile: Do you currently feel pressured by your peers and what they post on social media?

Mbali: No. Since the beginning of the year, I told myself that everything that I want I will be able to get, as long as I can focus on my books.

Sibongile: That is true, and I suppose that encourages you to do well in your academics.

Mbali: Absolutely. If I can pass, graduate and work. I won’t be happy and satisfied to get peanuts from someone else or to get what is small change for them. I need to get my own money, the one that I have studied for, the money that I have worked hard for that I will be earning on a month-to-month basis. I look forward to assisting and supporting my family financially as soon as I start working.

(Second interview, 4 March 2022)

**Status quo in relationships**

Sibongile: Mbali, may you please share with me your thoughts regarding a woman’s role in a relationship?

Mbali: In a relationship, your role as a woman is to be indecisive. When he says jump, you must jump. When he says that you must not do a certain thing, then strictly speaking, you do not do it. You must be below him. You must listen to him. You must be the traditional woman that will take the man’s word as final. We don’t have a chance to be ourselves and to express how we feel.

Sibongile: Do you agree with that?

Mbali: That is the common narrative in communities, families, sometimes even church. How I would like to carry myself in a relationship is by being fully supportive towards my partner. I want to support him emotionally, spiritually, physically and financially. I do not want my partner to think that I want him to support me financially whilst I support him physically. That is short-sighted according to my understanding.

Sibongile: It seems that you want to change the narrative with regards to how romantic relationships are usually constructed.

Mbali: Yes. So, it becomes a norm then to go to the man of the house and expect the same thing, because in previous relationships that is what would happen. So, availing myself to him physically so that he can give me money in return becomes a norm. We even end up calling the money “girlfriend allowance”.

Sibongile: Oh, meaning that even when you are married you go into marriage with those expectations.

Mbali: Yes, so when one is married, the woman would still expect the “girlfriend allowance” regardless of whether they are working or not. That leads to the woman not being able to do some things for herself, as she would be waiting for the girlfriend allowance to enable herself to afford the things that she needs to buy. In that case, the woman may not be working. Even if told that there is an opportunity, for example a part-time job, a person would just snap and say that they don’t want to be found cleaning toilets of another woman, meaning that she would rather wait with confidence for money that is coming from her boyfriend.

So, a man’s role in a relationship is to provide money. Whether the guy is doing well on an emotional level or not, that is not attended to.

Sibongile: The focus of the relationship becomes what women would like to benefit from the guy.

Mbali: That is, it. We just don’t care as women. That is why some men end up being in debt – it is because they need to borrow money so that provision can be made for the girlfriend allowance. Such relationships are not about supporting each other in as far as growth is concerned. For example, there would not be discussions on matters pertaining to work opportunities or on how to succeed in your studies. No ways. That is just not the point of being together.

Sibongile: The relationship becomes transactional with no consideration of empowering one another.

Mbali: Absolutely! If the man were to advise about work opportunities, the woman would be bored and ask if it is necessary to talk about school and about life.

Sibongile: Meaning that all that the person really wants is money.

Mbali: The guy needs to just send money! That is the truth about relationships these days. If you find a person suggesting that as a couple they open an investment account, that would be luck. Most ladies don’t want that.

Sibongile: Oh my! You can imagine that if the women were to agree, how much the money would have accumulated in five years’ time.

Mbali: The woman would just say “Yho” after five years! Who even said that she wants to get married. All she wants is to be given money so that she can buy what she needs.

(Second interview, 4 March 2022)

**Gender scripts**

Mbali: There is a trending expression that is used to communicate a need or even a want, mostly used by women as a means of attaining whatever it is that they desire. So, if I were to call my guy, I would say “ngi sabaweli[[1]](#footnote-1) ama hot wings”.

Sibongile: How is the guy expected to respond to the need or want?

Mbali: If the guy were to receive a phone call and hear the words “ngi SBWL”, he would need to send money for the hot wings, for example. There is also this phrase “indoda must” (a must must), meaning that indoda (a man) must have money, indoda must have a car. Our peers are just chasing after people’s money and cars. The expectation is that a woman needs to date a man that has a nice car so that one can sit in the front seat. That is what makes girls happy. I would be surprised if I were to hear the same person talking about attending conferences. If you were to start talking about school-related activities, you would just end up boring them.

Sibongile: That is unfortunate, because we all know that school is an important form of self-empowerment.

Mbali: Some women’s expectations in relationships would shock you. It is unrealistic, because no one would be able to sustain the demands of another human being over an extended period.

Sibongile: Even if that is the case, it does not seem to deter women that are determined to live life in that manner.

Mbali: True, I am reminded of the Single and Mingle show. The first thing that women ask is whether the guy has money. I think that the thinking process is something along the lines of “I must get paid for dating you”, implying that the woman would not agree to be in a relationship if the guy does not give her money.

Sibongile: How do you feel about the above sentiments?

Mbali: I don’t agree with them.

(Second interview, 4 March 2022)

**Criticism of transactional sexual relationships**

Mbali: Sometimes I wish not to find a partner that would give me money if I’m desiring to have things that I do not have. I wish to find someone that can encourage me to study further and to push harder at school so that when I SBWL something in the future, I can easily drive myself to that place and get it for myself.

Sibongile: That is great. So, you really do aspire towards becoming an independent woman.

Mbali: I do. I feel that if I SBWL for something and I know that there is someone who will buy for me those items, it would make me lazy.

Sibongile: So, it would discourage you from working harder?

Mbali: Yes, because it would seem so easy to attain those materialistic items.

Sibongile: Which perhaps can make you undermine the journey that you have undertaken.

Mbali: Exactly. One may even start questioning the value of attending school, especially if everything that I request is given to me. For example, if I were to say that I want an apartment and I knew that he could provide me with it. Such thinking processes are only for the present and are not aligned with the future at all. One doesn’t think about the future when not taking into consideration what would happen if the person were to lose their job or if the relationship were to end. Then how would one be able to make ends meet?

(First interview, 25 February 2022)

**Thoughts and reflections on how young women studying at universities can resist being in a relationship with a blesser**

Mbali: Practical examples of what first-year students can do to avoid finding themselves being influenced to engage in the blesser-blessee lifestyle: If they were used to eating pap and gravy at their home prior to coming to university, then they must continue. They should not even mind what other people are eating, even if others are constantly living on takeaways. They must not allow themselves to feel the pressure. One needs to tell themselves that the time will come for them to afford the life they want to live and that they will even have it in abundance. For example, what helped me not to feel pressurised to live other people’s lifestyles was to be true to myself. Even if it so happens that they like a certain shoe for example, if they don’t have the money to buy the shoe, they need to accept that they don’t have the money. Because if they feel forced to have the shoe whilst they cannot afford it, it may put them under pressure, and they may end up being involved with older men who would be able to buy them want they want. It should also not matter that their friend has new hair or is wearing make-up. If they were not applying make-up when they were at home, they can continue doing so at varsity. It’s like being at home. Here the only difference is the pressure that one would be exposed to in this space. My advice is that they need to be true to themselves, otherwise they will have a lot of regrets, such as being sick or being pregnant. At times people don’t even know who impregnated them. How would one explain such to their parents and everyone else at home? Imagine leaving home to come to varsity as a well-behaved child. It would not make sense when asked how you ended up in compromising and disgraceful situations, only to answer that you wanted to dress up in a certain way or that you wanted to eat certain foods.

Sibongile: I can imagine that it would be disappointing to the parents.

Mbali: Very much so. It is important that students stay in their lane and path. If it becomes difficult, they can rather escalate the matter to their lecturer or any other staff member who may be able to refer them to available support systems. For example, I was glad to be referred to the SNAPP (Student Nutrition and Progress Programme). It is not okay for a young person to find themselves being sick because of older people.

(Second interview, 4 March 2022)

1. A popular isiXhosa expression denoting a yearning for something, also abbreviated to SBWL [↑](#footnote-ref-1)
