# Supplementary material
Source: Research Square preprint supplement (doi:10.21203/rs.3.rs-8738924/v1)
Supplement: Supplementary file 4 [file f69afe08a7db38d266aa6782.docx]

**CHAPTER 3**

BOPHELO

The following are excerpts from the discussion between Bophelo and Sibongile:

**Absent parents**

Bophelo: You know, I do not even know the heartbeat of a mother or father. I was told that my mom left me when I was only three months old. The thought hurts. My past has made me realise that life is not that easy. Sometimes I wish that things did not turn out the way they did, but unfortunately it is what it is. From a young age, growing up has been hard.

Last night I was thinking and asking God questions such as why I had to grow up without the love and guidance of my parents. When I am feeling sad, all depressing memories come to mind. At that moment I feel that I could not escape them.

Sibongile: I can imagine that it was not easy growing up without the presence of your parents, but you mentioned that your mother came back home. Were you able to resolve the fact that she was not present in your life for a good number of years?

Bophelo: I saw that she is a good woman regardless of what happened. I love my mom. When she came back home, she apologised for her absence. I could tell that her apology was genuine, and she was willing to be a fully involved and present mother. Despite all that happened, my love for my mother is unmatched. She sat me down and answered in detail the questions I was asking her regarding what exactly she had been doing with her life. She explained that the main factor that made her leave was that she got driven away because she was in love with my dad. She left her home with hopes of getting married to my dad. Little did she know that she would be swayed into a lifestyle that made her mentally and emotionally unstable. She also told me that she used to make a lot of money and would go out with friends for days on end. She ended up being involved in drugs and stealing. I have written about my background and how it shaped me into the person that I am.

Sibongile: Thank you, that is thoughtful of you.

Bophelo: You are welcome. My mom explained that she wanted to grow old with my father since they were madly in love, but unfortunately my father was a thief. My maternal grandmother disapproved of their relationship from the beginning. My grandmother was always advising my mother to focus on her books since she was smart and bright, but she did not. She was even saving money for my mother to go to a university because she had faith in her. My grandmother’s dreams did not become a reality, because soon after my mother fell pregnant with me. Her life took on a different turn. My poor grandmother! After all these years, I don’t think that my grandmother is ready to reconcile with my father.

Sibongile: Really, after all this time?

Bophelo: Yes! I understand, because if I were in her shoes, I would probably feel the same. My grandmother knew that my mom was the light and hope for the family because of how bright she was. To have that taken away from you by someone else in this manner is painful. My father caused the destruction of my grandmother’s vision for my mom. Nonetheless, a part of me feels that my grandmother cannot keep on blaming others for how my mom’s life turned out to be. I wish that she can accept and not hold grudges. Sometimes I think that if God wanted my mom’s life to have been different, He would have shielded her from making such bad-informed decisions that destroyed her life. It is just a messed-up situation that my parents put themselves into, which consequently put their kids into a lot of confusion, bitterness and anger. That is the gist of my mom’s story.

(Second interview, 28 August 2021)

**Mental health issues that contributed to her mom’s absence**

Sibongile: Bophelo, may you please share with me when did your mother return to your maternal home?

Bophelo: She was 29 when she came back. Sadly, she died at the age of 31. My mom left Mpumalanga to be with my father. Even though things did not work out between them, she continued living there.

Sibongile: Do you possibly know how she was sustaining herself, especially after she had separated from your dad?

Bophelo: Yes, she told me, but I could tell from her eyes as she relayed the story that this was the most difficult thing for her to share with me.

Sibongile: Yes, I am listening.

Bophelo: Well, she was a sex worker. I think that because of her untreated mental health condition; it was easy for others to take advantage of her instability.

Sibongile: How so?

Bophelo: My mom was living a dangerous and rough life. She would drink alcohol and smoke weed whilst partying for days. Her lifestyle triggered the bipolarity that she was later diagnosed with. She was then forced to go back home because people saw that she was losing it. When she arrived at home, some believed that it was witchcraft. She was basically behaving the way I was prior to my recent admission. She was not normal when she came back.

Sibongile: What did you note about her that suggested that she was not normal?

Bophelo: She would keep to herself for long periods of time and always had a blank expression. It made it very difficult to engage with her. That made me feel angry, as I was expecting to bond straightaway with her. I felt extremely confused and lonely even though she was there with us.

Sibongile: Was she taking treatment for bipolar disorder?

Bophelo: No, because she had not disclosed to us that she was unwell or that she was on treatment and, therefore, needed medical help. My family and relatives were suspecting that my mom had been bewitched.

Sibongile: Oh really?

Bophelo: Yes. I think that it is because mental health issues were not discussed as openly as they are currently. It is only now that people understand that people are not mentally unstable because of witchcraft. The reason could be that access to knowledge, especially from professionals, was restricted in the rural areas in those days.

Sibongile: Do you know what channels your family used to assist your mother in becoming better?

Bophelo: Initially my family went the traditional healers’ route, but eventually she ended up getting medical treatment at Weskoppies.[[1]](#footnote-1) She apparently had a history of multiple admissions at Weskoppies.

Sibongile: That is good news.

Bophelo: Yes. If only we had known earlier, she would have been initiated in the treatment sooner.

(Second interview, 28 August 2021)

**Unmet needs**

Bophelo: When I moved to Pretoria, I was stranded. I did not have enough money for food, shelter and transport. Fortunately, I met this guy by the name of Modise. The thought of it makes me think just how my life has always revolved around men. I can say that I do have luck in attracting well-off men that are able to take care of me, but I think that my behaviour chased most of them away. No decent men would like to be in a relationship with a wild girl.

Sibongile: Any thoughts on what may have made you to be wild?

Bophelo: It is because I never had a chance to do what other children did, such as playing with friends and feeling loved by my parents. I feel that I was robbed of my childhood. I sometimes cry and ask God to relieve me from a life that revolves around men. I am not sure if it is a curse or what. Looking back upon my life, the only thing that has succeeded is men taking care of me. The books that I so loved, my dreams and goals never succeeded.

Sibongile: Men became and continue to be your source of support?

Bophelo: It is almost like I am unable to do much for myself without men.

Sibongile: What makes you say that?

Bophelo: I think it is because I do not have a support system, especially from my family. At times I also think that it may be due to how I was raised and the challenges that I faced. At other times I think that perhaps this is how my life was destined to be. I was able to free myself from depending on men when I left Pretoria to stay with my grandmother. To be honest, I never really left that life completely.

Sibongile: Please explain further.

Bophelo: Even though I desired from the core of my being to part ways with men, my unmet needs made it difficult for me to do so. I continued seeking out financial support from men who were willing to help me. I completely stopped depending on random men for money when Brian came into my life.

(First interview, 21 August 2021)

**Inadequate guidance from adults**

Bophelo: There was a time when I was studying at Tshwane South College (TSC), but because of the love that I have for my family I had to comprise on my studies.

Sibongile: How so?

Bophelo: My paternal grandmother had certain expectations of me. She expected me to take care of her.

Sibongile: Meaning to support her financially?

Bophelo: Yes! That meant that I had to drop out of school because of her so that I could meet her financial needs.

Sibongile: Did she explicitly tell you to drop out of school?

Bophelo: It was obvious that she was suggesting that. She left me with no other option, because she could see the effort that I was putting in by going to school, but it seemed like she was unappreciative of it. She kept on demanding money from me. She did not even ask how I was able to buy food and pay for my fees and transport. I was able to afford all those things from the bits and pieces of money I was getting from guys.

Sibongile: Was your grandmother working?

Bophelo: Yes, she was, but she still wanted money from me.

Sibongile: How was she expecting you to raise money knowing very well that you were unemployed?

Bophelo: Who? My grandmother? Oh no, she does not have time to think of such. She does not care. Her demands made me feel that she does not love me. How can an adult request that from their children, especially if they know that what they are demanding is something that is way beyond their means?

Sibongile: How did you feel when she kept on making demands like that?

Bophelo: I felt crushed. I was in total disbelief. There was a time when I turned to prostitution because I had no other means of making money. She knew about it, but she never even reprimanded me. That just goes to show that she does not care about me.

Sibongile: You feel that if she had given you guidance and support, perhaps you would not have turned to prostitution?

Bophelo: I think so. As I am thinking about it now, it seems that the reason she accommodated me was so that she could benefit financially. That woman pushed me to do prostitution. When she looked at me, she saw someone who would make money for her!

Sibongile: It must have been difficult to live with her.

Bophelo: She did not add value to my life as a good grandmother should. She would scold my cousins for wearing the same clothes that I would wear when we go out to party at a club, but she would not do that to me. Imagine! She used to treat us differently by showing me that there were children that she favoured more than others.

Sibongile: It makes one wonder the reason for her to behave in that manner.

Bophelo: She was indirectly telling me to stay in the dark. I think that she was not wishing me well. She was fine seeing me doomed. I have realised my mistakes, and it is unfortunate that no one was protecting me from the decisions that I was making. I regret some of the things that I have done. I find myself thinking quite a lot about my past. It is not a pleasant thing at all.

(Second interview, 28 August 2021)

**Lessons learned and reflections on her mother’s experiences**

Sibongile: You said you were an adolescent when your mother came back?

Bophelo: Yes. My mom gave birth to me when she was still very young. She was around 16, 17 years.

Sibongile: Were you able to process the anger that you felt towards your mother?

Bophelo: I do feel like I am following in a very similar path that she took, but I am trying to fight it.

Sibongile: Yes indeed, you are determined to resist going back because it has been two years since you stopped living that lifestyle.

Bophelo: Yes, I am trying, and I made a promise. She died early but I love the fact that she at least came back home. That lifestyle is not the way out. Not at all. My mother ended up getting a job.

Sibongile: Oh wow. That is nice.

Bophelo: Ya. She took care of us. She became a breadwinner.

Sibongile: She really improved her life significantly.

Bophelo: Yes, she did. She changed all those things that she did not like about herself, but unfortunately it was late. I guess God had decided that it was time. But I do think that it was God who sent her back home before she passed on so that she could explain to me her experiences in life. I also think that she spoke to me in that manner so that I do not end up walking the same road ... But I do understand in prostitution there is a lot of money, but it is tricky. One can find themselves doing drugs. You can even end up in jail. There is a lot going on there. You can meet people who are dangerous. One of my friends said that she met this other guy who told her that he wanted to have fun and that he will pay her. Some people, when you meet up with them, you will find that they will just put the money on the table. They want you to do all those crazy things because they know that you want money, while you know that money is the root of all evil. And obviously, you will be tempted to do whatever it is that they want you to do so that you can get that money. That job and its money is like a demon.

(Second interview, 28 August 2021)

**Trauma resulting from being coerced to sleep with men**

Sibongile: May you please tell me about your relationship with the father of your baby.

Bophelo: I had – well I thought that I had – the most incredible relationship ever in my life with him. He was my safe and happy space. Things changed for the worse when our baby passed away. The love that he had for me disappeared into thin air. Even though I saw that the relationship was no longer healthy for me, I convinced myself that he would heal and be the man that was once in love with me. Little did I know that multiple traumatic experiences were awaiting me. The father of my baby made a deal with his male customers that they could sleep with me if they were interested in doing so. He deceived them by telling them that I was his twin sister.

Sibongile: The father of your baby was selling you to his customers?

Bophelo: Yes. He was doing Rica[[2]](#footnote-2) for his customers. I had to drop out of school when I moved in with him and his family. The guys were giving him money and in exchange they expected me to avail myself to have sex with them. He was using me. In that process, I got used to the reality that men provide, especially finances.

Sibongile: What a dramatic change in your relationship with him. How long did that behaviour continue for?

Bophelo: For about seven to eight months. I left when he became abusive. The sad part is that he was conditioning me to be accustomed to a useless and valueless life. He stripped me of my dignity.

Sibongile: There was no longer any relationship between you two?

Bophelo: None whatsoever. I realised that I was turning out to be a slave, I was enslaving myself through my body to be precise. The space that he welcomed me to was becoming more hostile as the days went by. Even though he was using me, I had nothing to show for the monies that he was making through me. I ended up dropping out at school because I was no longer coping. I had to walk away from that relationship. If only I knew that that was the beginning of a troubled life, maybe I would not have stayed with him. Oh no, but I could not have.

Sibongile: Sounds like you were caught between a rock and a hard place.

Bophelo: I was destitute with nowhere to go.

Sibongile: Were you not able to go back to your family?

Bophelo: I went back to my cousin the same year, in 2011. That’s when I walked away from the guy, because that’s when I realised that my life was really fucked up. I went back to my cousin, and she wanted me to go back to him because that was the relationship that they knew, and thought was good for me. They respected him dearly. He was the only guy that I had ever dated. At that time, I was in Grade 6.

Sibongile: Hmmm, yes?

Bophelo: So, it was a six-year relationship. So, my cousins believed and hoped that he would marry me. They told me that I need to fix things with him and stick to one man only. I do not blame them, because they didn’t know what was happening in my life, since I am in KwaMhlanga (Mpumalanga Province), and they are here in Pretoria. Also, they would always see me looking good, as I would dress up and cover up marks from being beaten up by him.

Sibongile: You kept the abuse a secret from them?

Bophelo: Yes, I came to them with no bruises, and I would smile as if everything was ok, but deep down I was dying. When my cousin was forcing me to go back because she didn’t know the true story, I wrote her a letter telling her the reasons that were making me leave the father of my baby. My cousin was beyond horrified. She told me that I had to end the relationship for good. I separated permanently from him, but that was not the end of it because, as I told you, I became wild.

(First interview, 21 August 2021)

**Being labelled and its effects**

Bophelo: I wish I had a different story to tell about my family. It is disappointing to share negative things like these, but that is my truth. Despite all that has happened, I miss home. Problem is I feel like there is no space for me there, because it has never been a platform for me to be there at all. I even made a promise to the father of my baby that the moment I get a chance to move from that place, I would go for good. I felt like I did not belong in that place, because everything that I touched failed. At some point I grew up feeling like I was a cursed child. The thought of relocating to my dad’s home gave me hope and peace.

Sibongile: Your experiences made you feel like you had no sense of belonging?

Bophelo: Ya! It’s like that, because even when I was going to school, I would wake up at 4 am to study. Then I would start feeling dizzy because there was not much to eat, if at all. I would then walk to school and get to my class at around 7:45, as it was far. There is just a lot of things that happened in my life. I experienced so much rejection from friends.

Everyone distanced themselves from me.

Sibongile: How come?

Bophelo: I don’t know. Even with HIV, it’s like I had it before the test results proved it.

Sibongile: Why would people suspect such a thing, though?

Bophelo: There was a point when I got sick. I was admitted after my mother died at a hospital, which was shortly after giving birth. I had lost a lot of weight, so it was during that time that people were saying that I am HIV positive. I was confirmed HIV positive by that time at home. A lot of people feared me. Even now when I go and visit home and hang out at a club, there are ladies that would disclose my status to the guy and warn him to stay away from me.

Sibongile: So, people stigmatise you.

Bophelo: Yes, I have been living with that stigma my whole life. That is the reason I became so anxious when a friend of mine whom I used to date, passed away. The thought of people blaming me for his death was enough to make me have an episode.

Sibongile: You were worried about what people would say about you.

Bophelo: People have been generally harsh towards me, especially from home. So, I did not know how I would survive if I were to be called those derogatory names again.

(Second interview, 28 August 2021)

**Cursed and rejected daughter**

Bophelo: I met a guy in Pretoria who truly loved me. He paid lobolo after dating me for not more than six months. I had to run away from his home, because his dad was making sexual advances towards me. When that happened, I felt like I was cursed. Sometimes I think that I should write a book with the title “Cursed child” or “Rejected daughter”. It makes me feel sad that I have never really lived up to my goals and aspirations. As soon as there is something good going on for me, something bad takes away all the good. My happiness is short-lived.

Sibongile: Your father-in-law! Did you tell your fiancé, though?

Bophelo: I did, but at first, he was in disbelief, as he thought that I was making up a story. He saw that I was telling the truth when one day when he came back from work, he found me packed up with suitcases ready to leave their home. Sjoe, that man! He wanted to sleep with me. He was always monitoring my movements. Sometimes when he greeted me, he would touch my bum. I never had peace in that home. I never really had an opportunity of being myself until I met Brian. But sometimes I become scared that he will disappoint me. I always leave room for disappointment. I am at a point where, if someone lies to me, I do not really feel betrayed that much, because of all the disappointments that I have been through.

Sibongile: It does sound like your father-in-law’s and fiancé’s behaviour was a betrayal, because even though your then-fiancé may have had good intentions, he did not protect you from being harassed by his dad.

Bophelo: True, but I have made peace with that past of mine.

Sibongile: That is good.

Bophelo: There is something else that happened to me that I have not shared with you, which made me think that indeed I am a cursed child.

Sibongile: Yes dear?

Bophelo: The father of my child’s family made it a point that I fail in my studies. They tore my school uniform as well as my books. How would I have been able to proceed with my studies? That was another reason that caused me to drop out in Grade 11.

Sibongile: Did you ask them the reason for doing so?

Bophelo: Who would I ask, though? We were not on speaking terms. Mind you, I was treated as a slave, because slaves are not supposed to go to school. I was expected to cook, wash and iron for the entire family when I came back from school and on weekends.

Sibongile: The entire family?

Bophelo: The whole family. They gave me huge responsibilities whilst not minding that they had not even paid lobolo to my family.

Sibongile: They expected all of this from you whilst they had not married you?

Bophelo: I guess that it was a tit-for-tat situation.

Sibongile: Were they not supposed to have taken you as their daughter?

Bophelo: What? I am not. I am just a girl who came there needing food and shelter.

Sibongile: Plus, the fact that your baby passed away, there was no longer a close connection

I can imagine.

Bophelo: There was no connection anymore. What I carried was no longer there. So, each and every day when I came back from school, I had to be a wife.

Sibongile: All because you were living under their shelter?

Bophelo: That’s correct. Even when the boyfriend was cheating, I couldn’t say anything. They would tell me to pack my bags and go to my home. Even on the one or two occasions when I tried going home, there was turmoil. My family continued blaming and fighting me.

Sibongile: It was difficult!

Bophelo: It was too difficult, until I had to come here to Pretoria. That’s when I learned to live by myself. Even when I met Brian, I was staying alone.

(Third interview, 4 September 2021)

**Consequences of being in a loveless, unsupportive family**

Bophelo: After all the difficulties that I have been through, I have some comforting and good memories that give me hope in my moments of despair.

Sibongile: I am already having goose bumps. Please do tell.

Bophelo: I was one of the top performing students at my high school. From Grade 8 up until I dropped out in Grade 11. I was admired by learners as well as teachers for being smart and being able to help others where, for example, they needed clarity on a particular task. I assumed a lot of leadership positions at school. Some of my former schoolmates became shocked when they found out that I did not even complete Grade 12. I was always a confident student and was elected to be a vice-president at school. I was excelling. The only reason I failed was because of the things that were happening in my home.

Sibongile: That is commendable, Bophelo. I am glad that your teachers were able to pick up on your leadership gift. I need clarity: What exactly were they doing at your home that contributed towards you’re not doing well.

Bophelo: I was going to school and the whole family was not talking to me. I was attending the same school with my aunt’s child, and we were not talking to each other. That was toxic.

I felt like someone was killing me softly by stabbing me with a knife every day.

Sibongile: Your family was immensely hurting you.

Bophelo: They did it deliberately, hence the pain is deep.

Sibongile: I understand how you feel. I need to understand, dear, did the guy’s family pay lobola for you prior to staying with him?

Bophelo: No, I left by myself, because we were always fighting at home about the grant money. I even went to the social worker and reported what was happening. It was things as basic as not having stationery for school use. That made me feel like nobody was on my side. I felt alone. My understanding of the child grant is that the grant money needs to be used to the fulfilment of the child’s needs. I am not even talking about luxury things here. I am talking about things that would have added worth to my life, such as receiving a quality education. Even the fact that I am coming from a poor background cannot be used as an excuse, because the money was allocated to us so that we could go to school and have the basic things in life. For me, education is the most important thing that a parent can give his or her children. I appreciate women who are trying to do their best for their children, especially by encouraging them to do well at school. It is a pity that my family were not interested in nurturing my gifts. Instead of enhancing peace, the grant money caused a lot of division in my family.

Sibongile: What do you think happened?

Bophelo: My family love money, but it feels like some powerful force came between us. My aunty changed in the sense that she started to listen more to people from outside. My relationship with her started to become bitter. We started not to see eye to eye. I became the enemy. My granny informed me that my aunt wanted to get a protection order against me. Just imagine!

Sibongile: Instead of talking to you?

Bophelo: We were past the talking phase. She wanted me to get out of her house. Things spiralled from bad to worse. Everyone turned against me. I had no friends in that place.

Have you ever been to your home, and you feel like you are in a foreign land?

Sibongile: Sounds like a hostile place now.

Bophelo: My family made it to be that way.

(Second interview, 28 August 2021)

**First consensual relationship with a blesser**

Sibongile: May you please share with me how it happened for you to be in a relationship with a blesser?

Bophelo: We met in the hustle and bustle of Pretoria town. He was driving a fancy car whilst I was coming from a store that sells hairpieces. He stopped to speak with me. He told me that he was interested in me, and we exchanged cell phone numbers. I could tell that he was a decent guy. We dated for about three years. He took good care of me throughout.

Unfortunately, he ended up getting tired of me.

Sibongile: What made him get tired of you and the relationship?

Bophelo: I think it was because I was living with him whilst not working. He was a successful educated man who hung out with friends that were equally doing well. I think he felt that we were incompatible. He asked me about my qualification ko skolong [from school]. I lied, reason being I was ashamed of telling him that I dropped out of school in Grade 11. He told me that he wanted me to study further and enquired about my thoughts pertaining to what he was suggesting.

Sibongile: He wanted to see you progress with your life just as he was doing with his life?

Bophelo: Yes, I understand that, but he did not do that in a good way.

Sibongile: What do you mean?

Bophelo: He was forcing the whole process because he could have been patient and supported me nicely.

Sibongile: Do you think he realised that you were not telling him the truth?

Bophelo: I think so, because there was this other day when he called me. I was buying a few things for the house. He had come home from work for lunch. When I arrived, he started asking me in a rough way why I was not going back to school and how exactly did I think about our future if I was not going back to school. He gave me the beating of my life that day! I don’t know whether he wanted to push me away or if he really wanted me to go and study.

Sibongile: I can imagine how hurtful that must have been.

Bophelo: It was. I think he was tired of taking care of me. That was his way of saying, “I’m tired of feeding you. I am tired of your staying here and doing nothing. Just cooking and cleaning while not being keen on doing something that would further your education.” Therefore, I left and decided to come back again to Pretoria.

Sibongile: So that was the end of the relationship?

Bophelo: That was the end of our relationship, because I came back to Pretoria and registered at Tshwane College to do civil engineering, but I wanted to do beauty therapy, but I was late as the registrations were closed. I felt extremely lonely. He discontinued completely maintaining me. He did not even bother to send me some money, considering that he used to give me a lot of money. He was giving me R5 000 every month and I was also pushing my business of selling clothes. Usually, I have luck attracting men that are well-off.

Sibongile: How come?

Bophelo: Maybe it is because when I get into a relationship, I tell the person I am with everything about my past and current life. I tell them that I have nothing, even though it does not seem like it in a physical realm, because of the nice weaves and long nails. I tell them if they want to be with me, then they must help me. My former blesser understood perfectly and was giving me R5 000 a month.

Sibongile: Oh, that is a lot of money for an allowance.

Bophelo: That guy has money! He was not expecting me to buy groceries or anything else in the house. The R5 000 was all mine. What also bored him, I think, was my lifestyle. I used to go out to clubs and party up a storm! I guess he could not continue being with a drunkard who was partying every weekend. That is what always drives guys away from me, even if a guy is planning to marry me – but because of my lifestyle they just can’t keep up.

(First interview, 21 August 2021)

**Survival of the fittest**

Sibongile: Dear, you mentioned briefly that there was a time when you were a sex worker. May you please share your experiences as a sex worker?

Bophelo: I would say it was fun, but not all the time. I joined that business because I wanted to make money. I got into the business because I had no support and I had nowhere to go, especially when the lady that recruited me came to talk to me and I told her about my problems. As soon as I agreed to do the job, I presented myself in such a way that everyone could tell that I was a sex worker. I never really wanted that name for myself, but unfortunately, I found myself drowning there. When the lockdown came, all those names were posted on my social media walls.

Sibongile: How did people know about the job that you were doing?

Bophelo: The lifestyle that I was living made it obvious, I guess.

Sibongile: You felt that people could see and were reading between the lines?

Bophelo: Hillbrow is associated with a lot of disorderly things. Prostitution is rife in that place. People who knew that I was not formerly employed must have figured it out, because I was living a very lavish life, and I made it visible to the public.

Sibongile: Did your family know about the life that you were living?

Bophelo: Ya, my cousin. She could tell that it seemed that I was living way above my means as a non-working person. At that stage, I had just bought the latest iPhone cash. I explained to her that I had no option, as things were getting harder by the day. Before doing that job, I told most of my family members about the challenges that I was facing, especially the fact that I was no longer managing to pay my rent.

(First interview, 21 August 2021)

**Intense feelings of shame**

Sibongile: I am curious to know how you felt when you engaged with clients when you were rendering services as a sex worker.

Bophelo: Throughout that life of being a sex worker, I tried as best as I could to detach my feelings from the job. I always reminded myself of my goal. On several occasions when I felt that I had made enough money, I would take a few days off. During that time, I would spend time by myself in my flat. I would become aware of my thoughts, which were more focused on the fact that there was no love in my life and in the job that I was doing. No affection, no feelings. Guys do it for fun, we are doing it for money.

Sibongile: Did you feel that by detaching your feelings from the job that you were doing made it possible for you to continue doing it?

Bophelo: That is the sad reality.

Sibongile: I understand. You were explaining that for ladies, sex work is a form of business?

Bophelo: Yes, it is a business. It is a hustle for ladies. Men will treat you however they want and some of them will say things the way they want to say them, but you don’t have to be hurt. Based on my experiences, clients differ. Some are polite whilst others are mean. I used to not take what I was told to heart, especially mean comments.

Sibongile: Each client is different.

Bophelo: Yeah, so one cannot predict how the encounter would be. Usually, after a long day’s work, I come back to my flat all alone. As soon as I bathed, I could feel immense and intense feelings of disgust towards myself. I would look at myself in the mirror and all I could see was someone who had given up on herself. It was like my conscience was dying.

Sibongile: Sounds like you were regretting what you were doing.

Bophelo: Every day I would feel regret, especially when bathing. I would look at my body and feel and ask myself if tomorrow I would survive or die. That life is too rough and risky.

You survive by grace.

Sibongile: If it was that risky, what kept you going?

Bophelo: I wanted money, and I made money. My goals were realised through this job, but if there was something that I could change it was the fear that used to engulf me when I was about to meet a new client. I could say that it was fear of the unknown, but I forced myself and tried to be strong as I faced that fear so that my life could continue.

Sibongile: I can imagine that this would require one to have guts and to be brave.

Bophelo: Not easy, but I had to do it.

(Third interview, 4 September 2021)

**Need to numb emotions**

Sibongile: Alright. Let’s talk about your being wild. What do you mean by that?

Bophelo: I would say being wild meant that I couldn’t wait for the weekend. I would start preparing for the weekend from Wednesday.

Sibongile: What would you do to prepare for the weekend?

Bophelo: I would start to think about the outfits that I would wear over the weekend. I was into fashion, so I was keeping up with the trends. I would go to the clothing stores every weekend to make sure that I have new outfits. Problem was that I was not formally employed.

Sibongile: Yet you had your needs and wants.

Bophelo: Yes! So, I was left with no other option but to continue hustling.

Sibongile: What does hustling entail?

Bophelo: It meant that I needed to get the money through a man. That meant that I needed to compromise myself by sleeping with a guy so that he could give me at least R200 or

R300. I used to go to Marabastad.[[3]](#footnote-3)

Sibongile: That was your routine and how you lived your life.

Bophelo: Without any compromises I made sure that weekends were lit.4 Weekends provided me with a great opportunity for attracting men, so I had to make sure that I was hot. I could not be seen repeating clothes every time. My friends and I were all wild. We lived the same lifestyle of being wild.

Sibongile: So, you were surrounded by people who were living a life like yours?

Bophelo: Yes. I remember that my circle grew exponentially during those days. I became so popular amongst my friends. I became the one who organised places where we could go and have fun. I am grateful that amidst the hype, I never took drugs. There are a lot of girls who fall into the trap of using drugs when they are living that lifestyle. I only started smoking cigarettes recently during lockdown.

Sibongile: That is great that you are not using drugs. Do you drink alcohol?

Bophelo: Eish! Ya, but not so much now. When I was still wild, I would start drinking on Wednesday, Thursday, Friday, Saturday and Sunday. I would take two days off, which would be on a Monday and Tuesday.

Sibongile: Meaning that you drank alcohol most of the days of the week.

Bophelo: I was drinking with a mission. Whilst drinking I would be on the lookout for who is looking for me.

Sibongile: So, you would be marketing yourself to potential clients?

Bophelo: Yes! I packaged myself well by dressing in a sexually appealing manner. I knew that there would be at least one guy that showed an interest in me. I knew that there was no way I could go to a club and not target anyone. I would not demand, fight or compete with other ladies. I felt confident in myself when I walked into a club, because I always felt and told myself that I know that kiyanyisa [I am irresistible].

Sibongile: You knew that you attract someone’s attention.

Bophelo: Yeah, I would dress up in a mini skirt or shorts to show my legs. I knew that there was always a hungry lion.

Sibongile: Meaning?

Bophelo: A man who desperately wanted to have sex. Well, that worked out well, because I was also hungry in the pocket.

Sibongile: Oh, I understand. The hungry lion would spot you.

Bophelo: Yes, the hungry lion would see and then approach me. We would then decide where we wanted to go. As soon as the morning time came, I would remind him of my package. I would insist on being given my money because I would have given him whatever it is that he wanted. The saddest part about being in that business of prostitution is that it doesn’t allow you to be yourself, because you have to pretend with your emotions.

Sibongile: How so?

Bophelo: You constantly need to remind yourself that you went there for money. No feelings attached. No strings attached. When I would wake up in the mornings next to a stranger, I would feel ashamed, because as a woman I undressed for a man who does not even know me. I wonder how those men perceived me. I can imagine that most of them looked down on me. It’s so shameful! The only way I was able to do that job was when I was drunk, because it used to help me in that moment not to feel what was happening. I just did not want to feel the emotions at all, because it’s so sad. I used to always have beer in my fridge.

Sibongile: So, would you feel the feelings of shame and sadness after the deed?

Bophelo: In the mornings when I was sober, all those negative feelings would occupy my mind. After the deed the guy would just give you your money. He also doesn’t care.

Sibongile: I completely understand. Is it because the interaction is mostly impersonal and transactional?

Bophelo: Being driven to money can make one to do things that they never thought they would do. So, for me being drunk most of the time helped me a lot, because how else was I supposed to be with men that I did not even know?

(First interview, 21 August 2021)

**Born leader**

Sibongile: If you were to describe your childhood experiences in a sentence or two, what would you say comes to mind?

Bophelo: I wish I could say I had the best time in my childhood, but reality is I never really enjoyed my childhood, because the education that I loved was taken away from me. I lived my life as a maid when I was a child.

Sibongile: You have mentioned that you were passionate about your studies.

Bophelo: I was. I remember how passionately I would debate, and sometimes even won debate competitions at a national level. I represented my high school very well. My teachers were really proud of me. The challenge was that the life that I was living at home and at my former partner’s home distracted me from focusing on my books even though I loved them.

Sibongile: The fact that you were a vice-president means that your teachers had a lot of confidence in your leadership abilities.

Bophelo: Exactly. I was born a leader. Even yesterday I was thinking about my past successes.

Sibongile: You must do something about it, please. Nurture the leadership qualities in you.

Bophelo: Will see about that.

Sibongile: No, we are not letting it die. I mean you are still young and have the potential.

Bophelo [laughs]: Eish, I don’t know … I know, but you know what, it hurts; it is not going to be easy to pick it up.

Sibongile: It is not, but it is possible.

Bophelo: Yes, I do believe that it is possible, because I can feel it in me – it has not died. It hurts to lose it when you know you have it within yourself. Before you came, I was reminiscing about the things that used to make me feel proud and gave me a sense of dignity. Even my mom could see the great things that I was doing and used to encourage me. The only question that worries me is why was it that my family did not give me more support? Because if they did, I would have perhaps changed their lives for the better. It is a pity that by hurting me, they in turn ended up hurting themselves, because the things that they wanted to have, they ended up not having.

(Third interview, 4 September 2021)

**Impact of a loving relationship**

Sibongile: I understand that you have experienced considerable challenges in your life, but I am interested in knowing what motivates you to live a meaningful life.

Bophelo: I told myself that it would be best for me to let go even though it is not easy, because holding grudges will not help me in any way. I have accepted that I cannot change how my family behaved and sometimes continue to behave towards me. The one thing that I want to change is myself. I am bothered by how my mom’s life turned out. I want to do things differently now with my life.

Sibongile: Your self-awareness is impressive. Indeed, you do have the power to change and define who you are. Having positive thoughts about yourself and your future can motivate you to be resilient in reaching out and living your best dreams and goals, regardless of what other people may think of you. There is a possibility for you to change your life around, because you have already started on that journey.

Bophelo: True. That is my prayer. Now that I am with Brian, I feel so grateful about being alive. He gave me enough reasons to stop living as a sex worker. The stability, love and support from him have been incredible.

Sibongile: That is wonderful. Seems that he was intentional in enhancing your sense of self-worth as a woman.

Bophelo: Yes, what I value about him the most is that he does not rush me into making decisions or doing things, because he understands the person that I am. He has given me the space to be me. I would say that it was the first time that I met someone who believed in me. He could talk to me, and I could tell that he was talking a different language than the people that I have met before. Others would just listen, and they would pass. But with him, he kept on coming back. He did not like the fact that I was making money through sex work. He always encouraged me to stop living that life. His words of encouragement made me think that perhaps there is a second chance to improve and change my life for the better. He supports my business initiatives and provides me with money needed for me to register my business. I feel God’s presence in my life, and I also feel that I never stopped believing in love. He is providing me with good people that truly care about me, such as Brian. I am glad that now I do feel that all good things are possible. I appreciate that Brian does not ever shout at me. I must admit, though, that I do feel scared that he will disappoint me in future.

Sibongile: Those are positive reflections. I am glad that you have someone who is supporting you in that manner.

Bophelo: It is. Come to think of it, it has been two years since I have freed myself from living as a sex worker.

Sibongile: That is great news! How does that make you feel?

Bophelo: I feel very good about the progress that I have made, because it has enabled me to truly be myself. I even gained weight, because all along I was a tiny size 26. Imagine! How could I have possibly gained weight if I was always feeding myself with alcohol whilst I was not given enough time to rest. There are a lot of positive changes in my life. I have learned that I am a businesswoman. I see a bright future and it is becoming brighter each day.

(Third interview, 4 September 2021)

**Self-acceptance**

Bophelo: Finally, I can be myself, and learn to appreciate myself for who I am.

Sibongile: To appreciate your true self?

Bophelo: I am telling you. Look how beautiful we are.

Sibongile: We are embracing our natural beauty.

Bophelo: Natural beauty, hey! I know that sometimes make-up is needed, but now I don’t always have to hide myself.

Sibongile: Whereas you are just beautiful as you are.

Bophelo: The transformation is not easy at all, because when you go out, there is still other things. Like they will still propose to you in that manner. You know, Hillbrow is Hillbrow. I was thinking that I need to do shopping for dresses, because I need to cover my body as a woman. I know it is offensive for some people, as we believe that sometimes to be appreciated you must show off your body. You must show off your boobs, but there is a man that can come and be interested in me even if I am fully dressed.

Sibongile: Yes, being fully dressed does not mean that you are less attractive.

Bophelo: Not at all. The guy can still appreciate you. I can just dress up in the manner that I want to and can still meet guys who will say “Hello”, and I would be surprised and say, “Ahhh, I am wearing my doek and jean.”

Sibongile: Yes, just being simple.

Bophelo: Yes, so it means that life is just like that. You need to be who you are ... I do not have to try too hard by pinching myself in tight clothes. [Laughing]

(Third interview, 4 September 2021)

**Exiting sex work**

The following account reflects Bophelo’s post-trauma growth:

Bophelo: That is not the life I want to live; it is not taking me anywhere. Anyway, that money, you cannot do anything with it.

Sibongile: Really?

Bophelo: Argh!

Sibongile: Even if it comes in thousands of rands?

Bophelo [shaking head vehemently]: You cannot do anything with that money; you only think about stupid things such as weaves, nails, shoes, outfits and bags.

Sibongile: One is not able to progress in life.

Bophelo: Which and what progress?

Sibongile: You mentioned earlier that it is the devil’s money.

Bophelo: Yes! The devil’s money. What can you do with it? It is easy money. You just have a two-minute sex thing just to make someone cum; you did not cum, you did not enjoy it. Your feelings were not connected to it; just sacrifice yourself for two minutes or three minutes and then hold the money. You think you will think about how to spend it wisely?

Sibongile: I do not think so; easy come, easy go?

Bophelo: Easy come, easy go. But money you worked hard for, you will think of investing it. With that money, you will be buying shoes. I do not know how many shoes I have. I had a lot of shoes that were packed here. Some I even sold for R50. It’s a useless life.

Sibongile: There is no growth at all.

Bophelo: Absolutely not! You will buy weaves that are from here to here [showing different lengths], some blue, pink, white. And the nails make you feel like you are on top of the world. Whereas beauty does not take you anywhere.

Sibongile: You need to apply make-up, eyelashes, all the time.

(Second interview, 28 August 2021)

**Reflections**

Sibongile: Now that you have transitioned from the life that you used to live, how do you feel about yourself?

Bophelo: I feel good. I feel that I have gained my self-respect back, because I was starting to have names outside. I was losing respect. You know people can classify you. They can just tell by the way you dress up, because you lose the sense of dressing up as a woman. I mean, it’s okay for a woman to dress up in shorts when you feel like it. Dressing up does not define a person, but there are certain ways body language also talks. Like you know … eish, I don’t know. I start to hate this place again. I am trying to escape that life, because I know how it feels to be there, because there is nothing there. You will have nice things, a nice life, all weaves, all watches, money and whatsoever, but what about your health, what about yourself?

Sibongile: Your future, you know.

Bophelo: Where are you gonna die? What about your savings?

Sibongile: As you have previously mentioned, with that money you cannot do anything valuable.

Bophelo: You can’t do anything with it, because you still need to maintain yourself – again for another one. You need to level up; every day you need to level up. Even my friends are coming here every day and crying.

Sibongile: But they are making money.

Bophelo: But with that money you need to buy new outfits every day.

Sibongile: So, there is no space for savings for investments. It sounds like a vicious cycle whereby one ends up being trapped.

Bophelo: At the end of the day, they will end up giving you drugs and then you are done. Or maybe they will escort you somewhere.

Sibongile: Just imagine!

Bophelo: Ya, and then you are done.

Sibongile: It is sad how things can turn out to be, hey?

Bophelo: Very sad.

Sibongile: As previously mentioned, you were recently offered work at a club?

Bophelo: Yes, I was.

Sibongile: What would you have been expected to do at the club?

Bophelo: Ah, same old, same old. I would be expected to entertain men whilst wearing short stuff so that I can show off my thighs. I am tired of living that life. I would still need to wear heels and other clothing items to sell myself to men. Money will still tempt me.

Sibongile: So, did you refuse the job offer?

Bophelo: I just told him that I need time to think about it and I will call him back. Either way, I know that it is still the same. Nna [I] want to work. I want to challenge myself by working in an entirely different environment. An environment that does not entail money-making through sexual interactions with men.

Sibongile: Being the born leader that you are, I do believe that you can, with support, see your plans to fruition.

Bophelo: Exactly.

(Third interview, 4 September 2021)

**Personal goals and dreams**

Sibongile: So, in addition to your relationship with God, what else is motivating you? You keep on saying that it is hard, and I do understand that the process of change is not easy. What else motivates you?

Bophelo: Uhm, I knew what I wanted to be when I was young, but it is just that a lot of things came my way to destroy me. I knew that … You know what, because as a visionary you know that when you are young you have dreams. I was like, “Oh me, I will do nursing, then I will go to church and then get married.” But life sometimes does not give you what you plan. You might write your life in your book, but it won’t be the same. Because we live with people. We are not in this world alone. We live with people with different visions and different looks. So, what can I say …

Sibongile: So basically, what you are saying is that your dreams, visions and goals about yourself are driving you to become a better person.

Bophelo: Yes, because I know who I am.

Sibongile: So, where do you see yourself in five to ten years’ time from now?

Bophelo: Big, I swear. Big. [Laughing]

Sibongile: That is wonderful.

Bophelo: I am telling you, I will fight.

(Third interview, 4 September 2021)

1. Weskoppies Psychiatric Hospital located in Pretoria West, Gauteng. [↑](#footnote-ref-1)
2. Short for the Regulation of Interception of Communications and Provision of Communication-Related Information Act, which is a process whereby every single sim card in South Africa is registered with a user’s personal details such as living address and ID number. [↑](#footnote-ref-2)
3. A business area in the centre of Pretoria which is characterised by an informal economic system. 4 Informal term denoting something that is fun and worth looking forward to. [↑](#footnote-ref-3)
